# Supplementary material for: Transcriptomic meta-signatures identified in Anopheles gambiae populations reveal previously undetected insecticide resistance mechanisms
Source: PubMed Central journal article supplement (PMC6290077; doi:10.1038/s41467-018-07615-x), 2018-12-11
Supplement: 41467_2018_7615_MOESM1_ESM.pdf [file 41467_2018_7615_MOESM1_ESM.pdf]

## **Description of Additional Supplementary Files**

File Name: Supplementary Data 1

Description: Significant Transcripts after dsMet Knockdown. VectorBase ID, Gene Description, Log2 Fold Change, Adjusted p-value and Fold Change for each significant ( $p \leq 0.05$ ) transcript from microarray experiment comparing dsMet and dsGFP control adult female *Tiassale* mosquitoes.
