# Supplementary material for: Transcriptomic meta-signatures identified in Anopheles gambiae populations reveal previously undetected insecticide resistance mechanisms
Source: PubMed Central journal article supplement (PMC6290077; doi:10.1038/s41467-018-07615-x), 2018-12-11
Supplement: 41467_2018_7615_MOESM4_ESM.pdf [file 41467_2018_7615_MOESM4_ESM.pdf]

**Transcriptomic meta-signatures identified in *Anopheles gambiae* populations reveal previously undetected insecticide resistance mechanisms.**

**Ingham et al.**

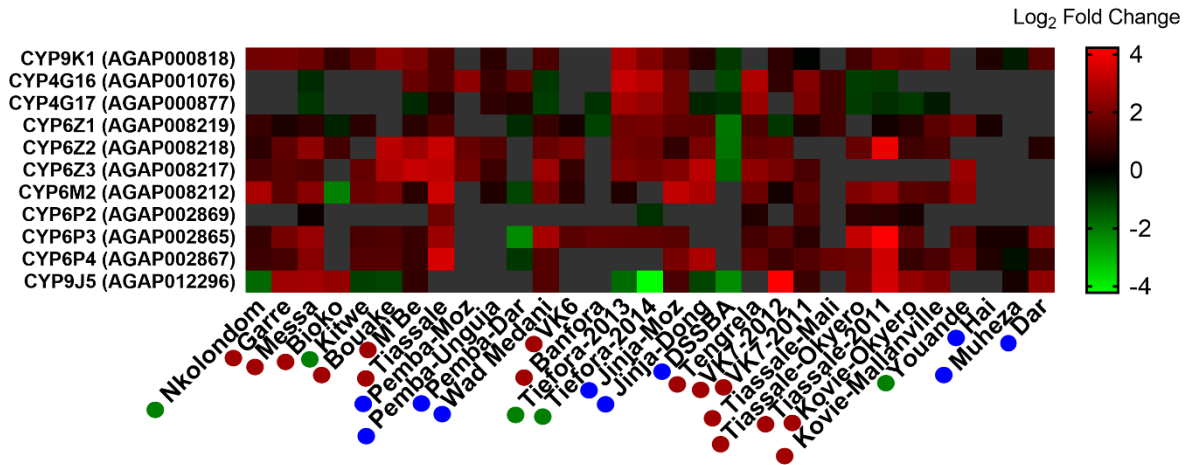

**Supplementary Figure 1: Heatmap showing the  $\log_2$  fold change for each cytochrome p450 previously reported to be involved in insecticide resistance.**  $\log_2$  fold change for 11 cytochrome p450s previously linked to insecticide resistance in each or the 31 microarray experiments used in IR-TEEx. *CYP6M2*, *CYP6P2*, *CYP6P3*, *CYP6P4*, *CYP6Z1*, *CYP6Z2*, *CYP6Z3* and *CYP9J5* have all been shown to bind directly to or metabolise at least one class of insecticides<sup>20,22,30,68,69</sup>. *CYP4G16* catalyses the final step of hydrocarbon biosynthesis and has been shown to be strongly associated with pyrethroid resistance, alongside its paralog *CYP4G17*<sup>51</sup>. *CYP9K1* has been linked to a selective sweep in Mali associated with insecticide usage<sup>70</sup>. Red circles represent *An. coluzzii*, green *An. gambiae* and blue *An. arabiensis*. Grey shading demonstrates non-significance. It should be noted that some co-hybridisation of *CYP6Z2* and *CYP6Z3* is possible due to high probe similarity (Supplementary Table 4).

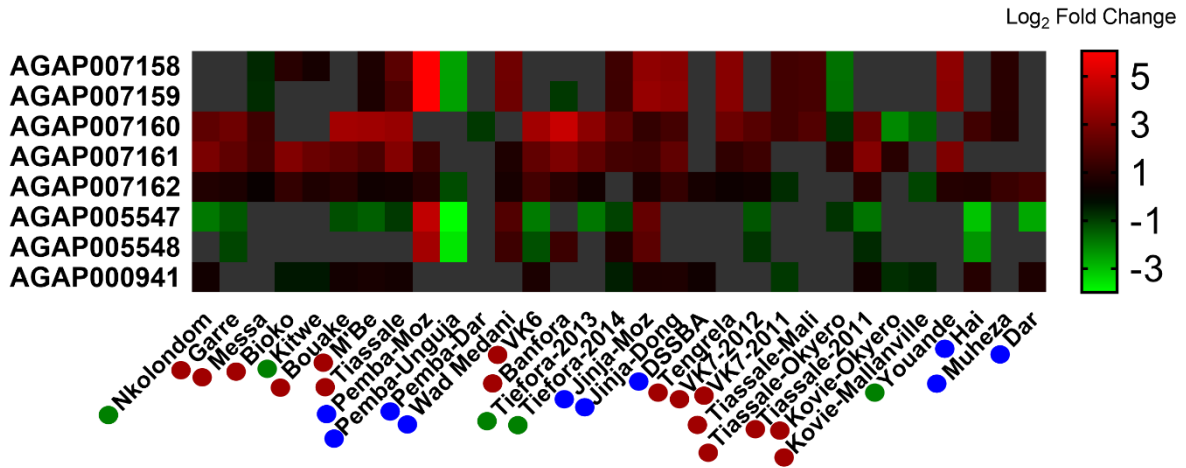

**Supplementary Figure 2: Heatmap showing the  $\log_2$  fold change for each  $\alpha$ -crystallin transcript in the 2L cluster.**

$\log_2$  fold change for each of the five  $\alpha$ -crystallins clustered on 2L in the *An. gambiae* genome for each of the 31 datasets used in the IR-TE<sub>x</sub> app. Red circles represent *An. coluzzii*, green *An. gambiae* and blue *An. arabiensis*. Grey shading demonstrates non-significance.

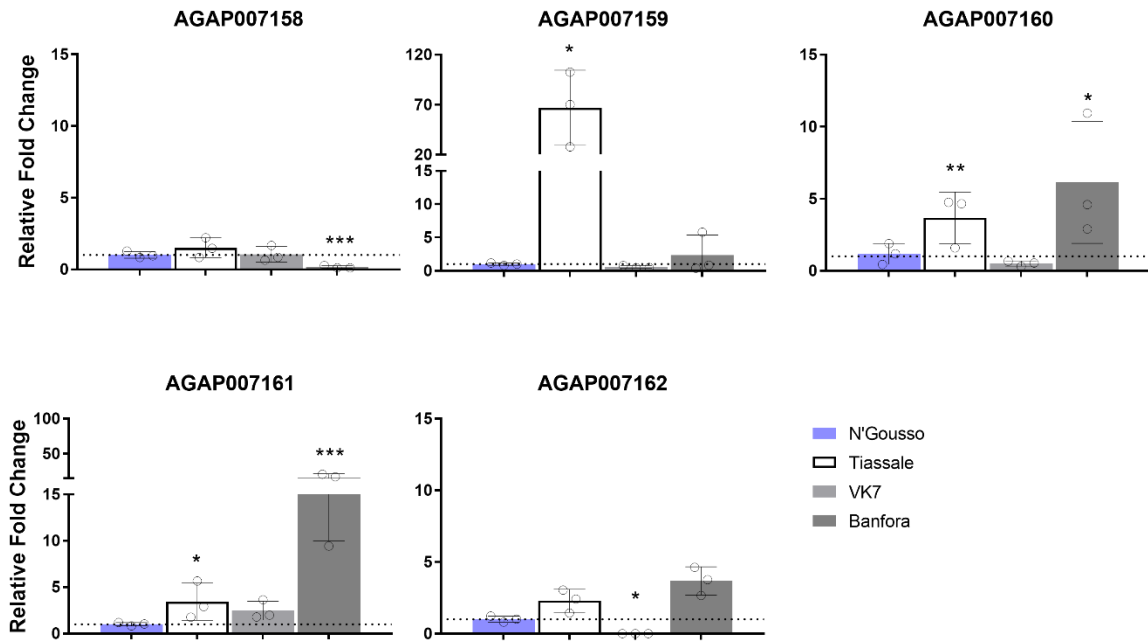

**Supplementary Figure 3: qPCR analysis of 5 of the  $\alpha$ -crystallins clustered on 2L from multiple resistant populations.** qPCR results of three 3-5 day old, unexposed, pyrethroid resistant *Anopheles* populations compared to the lab susceptible N'Gousso, three biological replicates and three technical replicates were used for each gene. Relative fold change (y), and resistant populations (x). Standard deviation bars are shown, with significance \*  $p \leq 0.05$ , \*\*  $p \leq 0.01$ , \*\*\*  $p \leq 0.001$  as calculated by an ANOVA with Dunnett's *post hoc* test and in the cases of AGAP007162 and AGAP007159 a Kruskal-Wallis with Dunn's *post hoc* test.

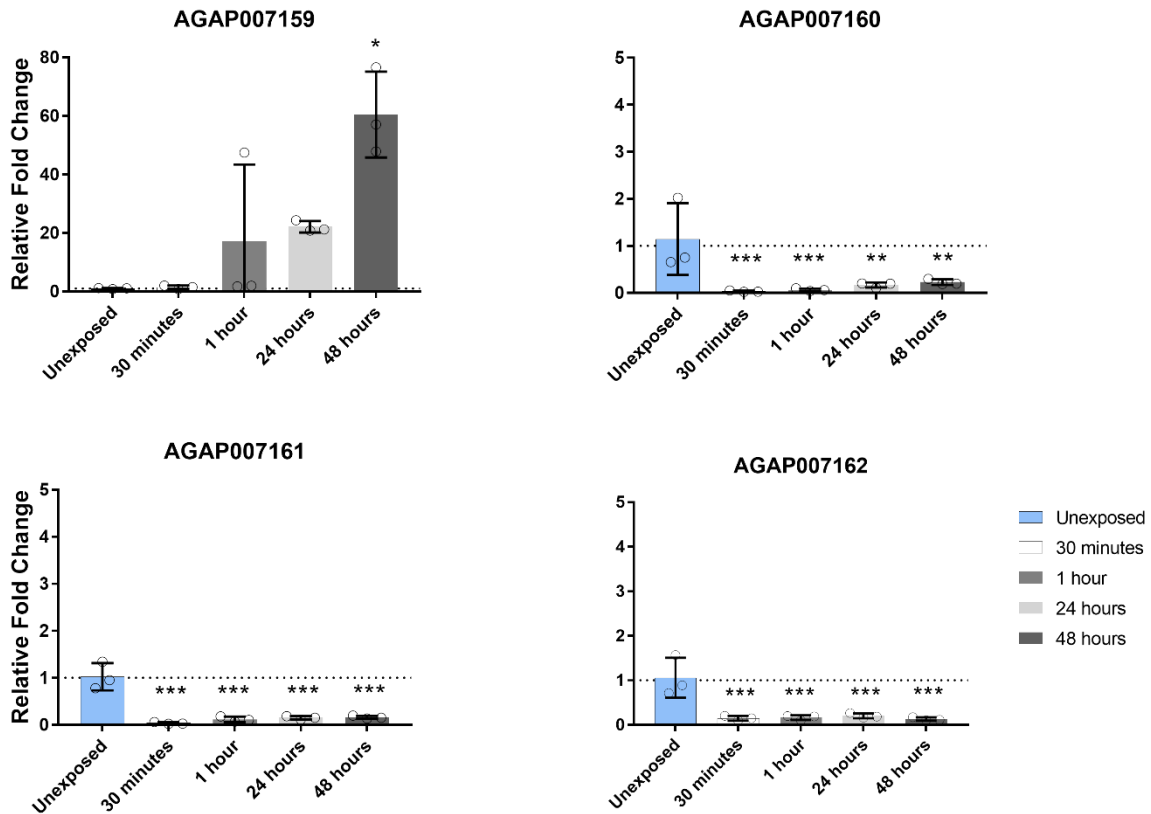

**Supplementary Figure 4: Induction of  $\alpha$ -crystallin family after exposure to deltamethrin.** The 4  $\alpha$ -crystallins showing differential expression in at least one resistant population were screened in Tiassale mosquitoes at four time points following deltamethrin exposure. qPCR was performed on 3-5 day old females exposed to WHO 0.05% deltamethrin papers for 1 hours, at 30 minutes, 1 hour, 24 hours and 48 hours post-exposure. All data is normalised relative to 3-5 day old unexposed Tiassalé female mosquitoes, three biological replicates and three technical replicates were used for each. Relative fold change (y-axis) and time points (x-axis) are shown. Standard deviation bars are shown, with significance \*  $p \leq 0.05$ , \*\*  $p \leq 0.01$ , \*\*\*  $p \leq 0.001$  as calculated by ANOVA with Dunnett's *post hoc* test, except AGAP007159 which was calculated by Kruskal-Wallis with Dunn's *post hoc* test.

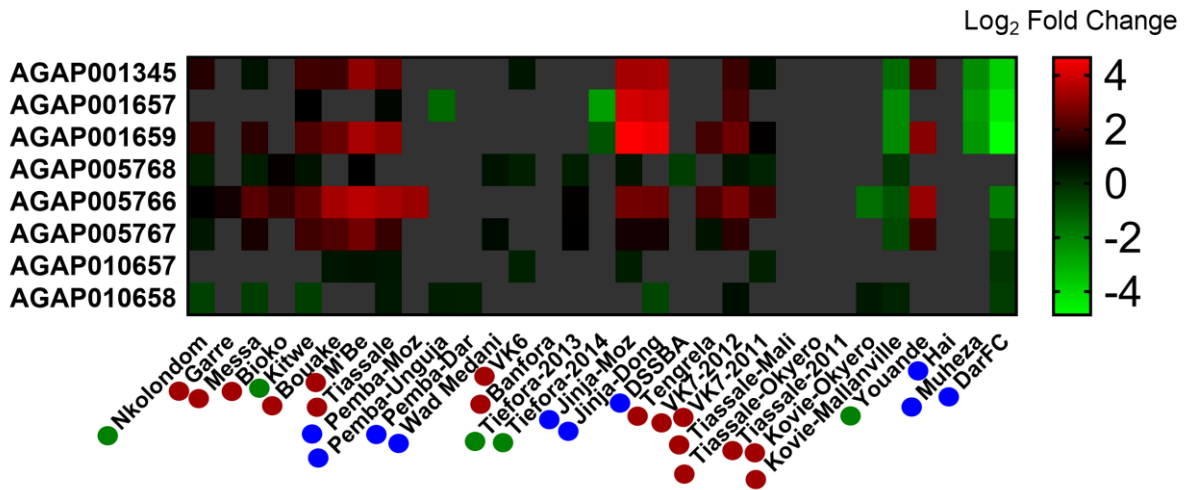

**Supplementary Figure 5: Heatmap showing the log<sub>2</sub> fold change for each hexamerin transcript.**

Log<sub>2</sub> fold change for each hexamerin represented in the *An. gambiae* genome for each of the 31 datasets used in the IR-TEX app. Red circles represent *An. coluzzii*, green *An. gambiae* and blue *An. arabiensis*. Grey shading demonstrates non-significance.

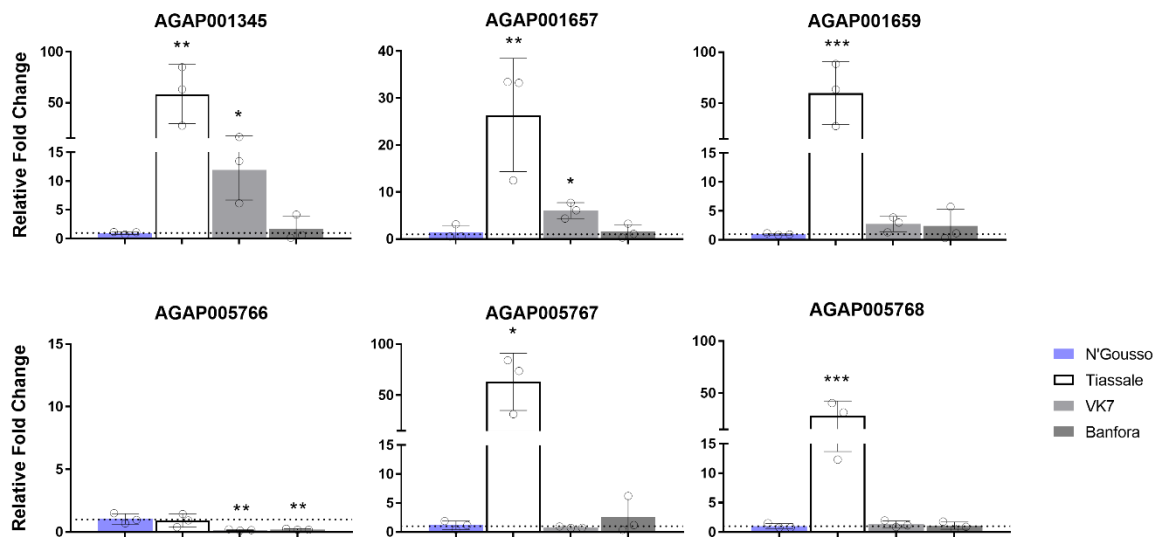

**Supplementary Figure 6: qPCR analysis of hexamerin family from multiple resistant populations.**

qPCR results of three 3-5 day old, unexposed, pyrethroid resistant *Anopheles* populations compared to the lab susceptible N'Gouso, three biological replicates and three technical replicates were used for each gene. Relative fold change (y), and resistant populations (x). Standard deviation bars are shown, with significance \*  $p \leq 0.05$ , \*\*  $p \leq 0.01$ , \*\*\*  $p \leq 0.001$  as calculated by ANOVA with Dunnett's *post hoc* test.

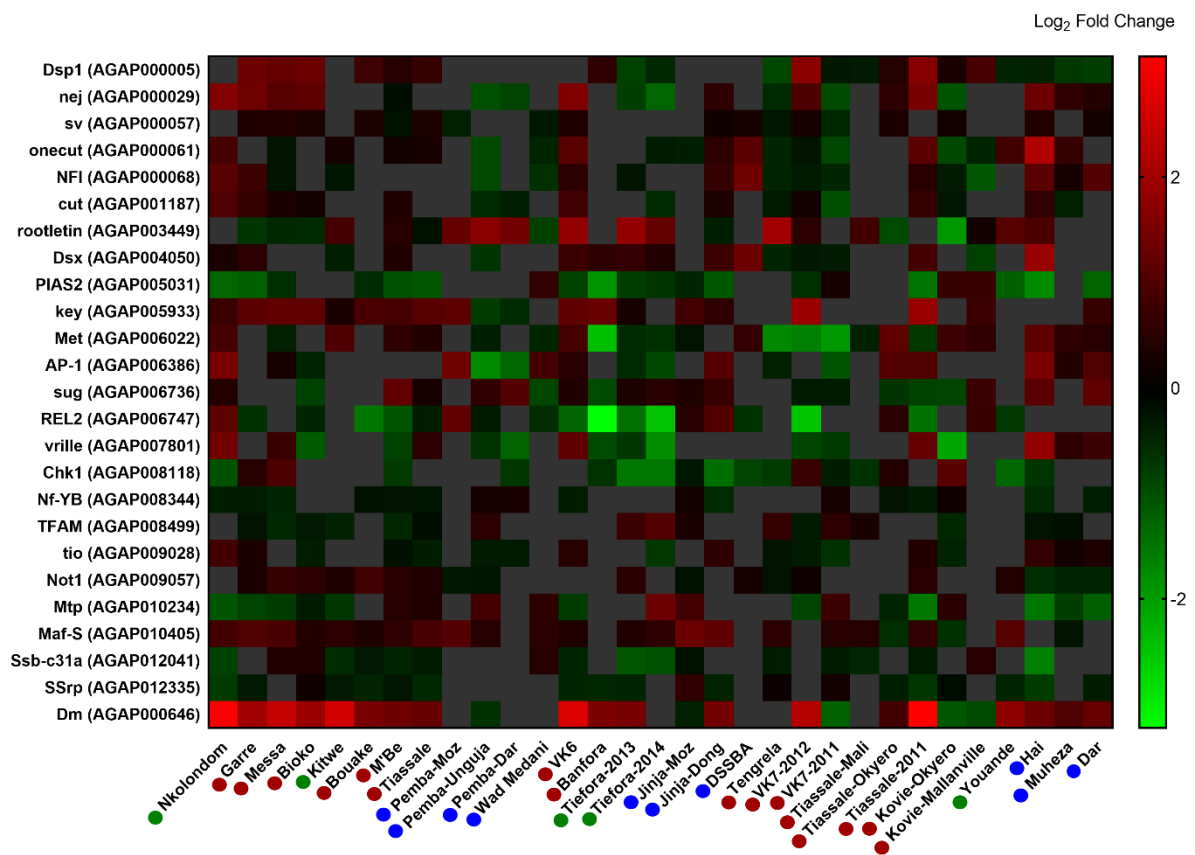

**Supplementary Figure 7: Heatmap showing the  $\log_2$  fold change for each transcription factor significantly differential in at least 50% of the experiments.**

$\log_2$  fold change for each hexamerin represented in the *An. gambiae* genome for each of the 31 datasets used in the IR-TEX app. Red circles represent *An. coluzzii*, green *An. gambiae* and blue *An. arabiensis*. Grey shading demonstrates non-significance.

Supplementary Table 1: Meta-data associated with each of the 31 analysed microarray experiments

| Name in IR-TEX   | Name of Resistant Population | Species    | Country of origin of resistant population | Resistant Collection Location | Co-ordinates of Sample Site                                                                                                                              | Year resistant mosquitoes collected | Insecticide mosquitoes were exposed to prior to RNA extraction from survivors | WHO Paper Exposure Time pre-RNA extraction | Resistant population mortality                                                                                                                                                                                           | Description of mosquito breeding site | Frequency of kdr alleles in population                                                                                                                                                                                                                            | Susceptible Population                                                                                                                                                                                                                                                                                                                | Country of origin of susceptible population | Reference        | ArrayExpress Accession Number |
|------------------|------------------------------|------------|-------------------------------------------|-------------------------------|----------------------------------------------------------------------------------------------------------------------------------------------------------|-------------------------------------|-------------------------------------------------------------------------------|--------------------------------------------|--------------------------------------------------------------------------------------------------------------------------------------------------------------------------------------------------------------------------|---------------------------------------|-------------------------------------------------------------------------------------------------------------------------------------------------------------------------------------------------------------------------------------------------------------------|---------------------------------------------------------------------------------------------------------------------------------------------------------------------------------------------------------------------------------------------------------------------------------------------------------------------------------------|---------------------------------------------|------------------|-------------------------------|
| GarreFC          | Garre                        | coluzzii   | Cameroon                                  | Garre, Youande                | 3.85,11.5*                                                                                                                                               | 2009                                | DDT                                                                           | 1 hour                                     | 38%                                                                                                                                                                                                                      | Polluted                              | 78% 1014F*                                                                                                                                                                                                                                                        | N'Gouso*                                                                                                                                                                                                                                                                                                                              | Cameroon                                    | 7                | E-MTAB-1382                   |
| MessaFC          | Messa                        | coluzzii   | Cameroon                                  | Messa, Youande                | 3.85,11.5*                                                                                                                                               | 2009                                | DDT                                                                           | 1 hour                                     | 54.30%                                                                                                                                                                                                                   | Unpolluted                            | 29% 1014F*                                                                                                                                                                                                                                                        | N'Gouso*                                                                                                                                                                                                                                                                                                                              | Cameroon                                    | 7                | E-MTAB-1382                   |
| NkolondomFC      | Nkolondom                    | gambiae    | Cameroon                                  | Nkolondom, Youande            | 3.85,11.5*                                                                                                                                               | 2009                                | DDT                                                                           | 1 hour                                     | 3.90%                                                                                                                                                                                                                    | Urban farming                         | 1014F*                                                                                                                                                                                                                                                            | Kisumu*                                                                                                                                                                                                                                                                                                                               | Kenya                                       | 7                | E-MTAB-1382                   |
| BiokoFC          | Bioko                        | coluzzii   | Equatorial Guinea                         | Malabo                        | 3.75,8.73                                                                                                                                                | 2011                                | Deltamethrin                                                                  | 1 hour                                     | 40%                                                                                                                                                                                                                      |                                       | 58% 1014F^                                                                                                                                                                                                                                                        | N'Gouso*                                                                                                                                                                                                                                                                                                                              | Cameroon                                    | 8                | VectorBase                    |
| KitweFC          | Kitwe                        | gambiae    | Zambia                                    | Kitwe, Copperbelt Province    | -12,82,28.22                                                                                                                                             | 2011-2012                           | Deltamethrin                                                                  | 1 hour                                     | 38.40%                                                                                                                                                                                                                   |                                       | 91% 1014F^                                                                                                                                                                                                                                                        | Kisumu*                                                                                                                                                                                                                                                                                                                               | Kenya                                       | 9                | See Paper                     |
| BouakeFC         | Bouake                       | coluzzii   | Cote D'Ivoire                             | Bouake                        | 7.69,-5.04                                                                                                                                               | 2010                                | Deltamethrin                                                                  | 1 hour                                     | 18%                                                                                                                                                                                                                      |                                       | 100% 1014F"                                                                                                                                                                                                                                                       | N'Gouso*                                                                                                                                                                                                                                                                                                                              | Cameroon                                    | 10               | E-MTAB-3212                   |
| TiassaleFC       | Tiassale                     | coluzzii   | Cote D'Ivoire                             | Tiassale                      | 5.90,-4.43                                                                                                                                               | 2010                                | Deltamethrin                                                                  | 1 hour                                     | 15%                                                                                                                                                                                                                      |                                       | 82% 1014F"                                                                                                                                                                                                                                                        | N'Gouso*                                                                                                                                                                                                                                                                                                                              | Cameroon                                    | 10               | E-MTAB-3211                   |
| MBeFC            | MBe                          | coluzzii   | Cote D'Ivoire                             | M'Be                          | -5.29,7.41                                                                                                                                               | 2010                                | Deltamethrin                                                                  | 1 hour                                     | 26%                                                                                                                                                                                                                      |                                       | Unknown                                                                                                                                                                                                                                                           | N'Gouso*                                                                                                                                                                                                                                                                                                                              | Cameroon                                    | 10               | E-MTAB-3210                   |
| PembaDarFC       | Pemba                        | arabiensis | Tanzania                                  | Pemba, Zanzibar               | -5.03,39.78                                                                                                                                              | 2012                                | Lambda-Cyhalothrin                                                            | 1 hour                                     | 48.90%                                                                                                                                                                                                                   | Rural inland                          | Unknown                                                                                                                                                                                                                                                           | Dar*                                                                                                                                                                                                                                                                                                                                  | Tanzania                                    | 11               | E-MTAB-2074                   |
| PembaUngFC       | Pemba                        | arabiensis | Tanzania                                  | Pemba, Zanzibar               | -5.03,39.78                                                                                                                                              | 2012                                | Unexposed                                                                     |                                            | 48.9% (Lambda)                                                                                                                                                                                                           | Rural inland                          | Unknown                                                                                                                                                                                                                                                           | Unguja                                                                                                                                                                                                                                                                                                                                | Tanzania                                    | 11               | E-MTAB-2074                   |
| PembaMozFC       | Pemba                        | arabiensis | Tanzania                                  | Pemba, Zanzibar               | -5.03,39.78                                                                                                                                              | 2011                                | Lambda-Cyhalothrin                                                            | 1 hour                                     | 34%                                                                                                                                                                                                                      | Rural inland                          | Unknown                                                                                                                                                                                                                                                           | Moz*                                                                                                                                                                                                                                                                                                                                  | Mozambique                                  | 11               | E-MTAB-2075                   |
| WadMedaniFC      | Wad Medani                   | arabiensis | Sudan                                     | Wad Medani                    | 14.39,33.54                                                                                                                                              | 2010                                | Permethrin                                                                    | 1 hour                                     | 60-80%                                                                                                                                                                                                                   | Subsistence agriculture               | 81% 1014F*                                                                                                                                                                                                                                                        | Dong*                                                                                                                                                                                                                                                                                                                                 | Sudan                                       | 12               | E-MEXP-3656                   |
| VK6FC            | VK6                          | coluzzii   | Burkina Faso                              | Vallee de Kou                 | 11.39,-4.41*                                                                                                                                             | 2010                                | Unexposed                                                                     |                                            | 20% (delta)                                                                                                                                                                                                              | Wooded savannah                       | 73.1% 1014F*                                                                                                                                                                                                                                                      | N'Gouso*                                                                                                                                                                                                                                                                                                                              | Cameroon                                    | 13               | E-MTAB-1083                   |
| BanforaFC        | Banfora                      | coluzzii   | Burkina Faso                              | Banfora                       | 10.64,-4.76                                                                                                                                              | 2014                                | Unexposed                                                                     |                                            | 0% (perm)                                                                                                                                                                                                                | Unknown                               | Unknown                                                                                                                                                                                                                                                           | N'Gouso*                                                                                                                                                                                                                                                                                                                              | Cameroon                                    | Unpublished data | E-MTAB-6498                   |
| Tiefora13FC      | Tiefora                      | gambiae    | Burkina Faso                              | Banfora                       | 10.64,-4.76                                                                                                                                              | 2013                                | Unexposed                                                                     |                                            | 33% (perm)                                                                                                                                                                                                               |                                       | 95% 1014F^                                                                                                                                                                                                                                                        | Kisumu*                                                                                                                                                                                                                                                                                                                               | Kenya                                       | Unpublished data | E-MTAB-6499                   |
| Tiefora14FC      | Tiefora                      | gambiae    | Burkina Faso                              | Banfora                       | 10.64,-4.76                                                                                                                                              | 2014                                | Unexposed                                                                     |                                            | 0% (perm)                                                                                                                                                                                                                |                                       | Unknown                                                                                                                                                                                                                                                           | Kisumu*                                                                                                                                                                                                                                                                                                                               | Kenya                                       | Unpublished data | E-MTAB-6500                   |
| JinjaMozFC       | Jinja                        | arabiensis | Uganda                                    | Jinja district-Walukuba       | 1.03,34.24*                                                                                                                                              | 2011                                | Permethrin                                                                    | 1 hour                                     | 56.90%                                                                                                                                                                                                                   | Urban centre                          | 0.07% 1014S^                                                                                                                                                                                                                                                      | Moz*                                                                                                                                                                                                                                                                                                                                  | Mozambique                                  | 14               | E-MTAB-1873                   |
| JinjaDongFC      | Jinja                        | arabiensis | Uganda                                    | Jinja district-Walukuba       | 1.03,34.24*                                                                                                                                              | 2011                                | Permethrin                                                                    | 1 hour                                     | 56.90%                                                                                                                                                                                                                   | Urban centre                          | 0.07% 1014S^                                                                                                                                                                                                                                                      | Dong*                                                                                                                                                                                                                                                                                                                                 | Sudan                                       | 14               | E-MTAB-1873                   |
| DSSBAFC          | DSSBA                        | arabiensis | Burkina Faso                              | Dioulassoba                   | 11.18,4.29*                                                                                                                                              | 2009                                | DDT                                                                           | 1 hour                                     | 65.8-70.4%                                                                                                                                                                                                               | Polluted, urban district              | 43% 1014S*                                                                                                                                                                                                                                                        | Moz*                                                                                                                                                                                                                                                                                                                                  | Mozambique                                  | 15               | E-MTAB-1224                   |
| VK7_11FC         | VK7                          | coluzzii   | Burkina Faso                              | Vallee de Kou                 | 11.65,-4.68*                                                                                                                                             | 2011                                | Deltamethrin                                                                  | 4 hour                                     | 0%                                                                                                                                                                                                                       | Wooded savannah                       | 82.3% 1014F^                                                                                                                                                                                                                                                      | Mali*                                                                                                                                                                                                                                                                                                                                 | Mali                                        | 10               | E-MTAB-2859                   |
| VK7_12FC         | VK7                          | coluzzii   | Burkina Faso                              | Vallee de Kou                 | 11.65,-4.68*                                                                                                                                             | 2012                                | Deltamethrin                                                                  | 10 hour                                    | 0%                                                                                                                                                                                                                       | Wooded savannah                       | 88% 1014F^                                                                                                                                                                                                                                                        | N'Gouso*                                                                                                                                                                                                                                                                                                                              | Cameroon                                    | 10               | E-MTAB-2875                   |
| TengrelaFC       | Tengrela                     | coluzzii   | Burkina Faso                              | Tengrela                      | 10.67,-4.83*                                                                                                                                             | 2012                                | Unexposed                                                                     |                                            | 50%                                                                                                                                                                                                                      |                                       | 87.7% 1014F^                                                                                                                                                                                                                                                      | Mali*                                                                                                                                                                                                                                                                                                                                 | Mali                                        | 10               | E-MTAB-2875                   |
| TiassaleMaliFC   | Tiassale                     | coluzzii   | Cote D'Ivoire                             | Tiassale                      | 5.90,-4.83                                                                                                                                               | 2011                                | Unexposed                                                                     |                                            | 23% (perm)                                                                                                                                                                                                               |                                       | 83% 1014F^                                                                                                                                                                                                                                                        | Mali*                                                                                                                                                                                                                                                                                                                                 | Mali                                        | 16               | E-MTAB-1903                   |
| TiassaleOkyerofc | Tiassale                     | coluzzii   | Cote D'Ivoire                             | Tiassale                      | 5.90,-4.83                                                                                                                                               | 2011                                | Unexposed                                                                     |                                            | 23% (perm)                                                                                                                                                                                                               |                                       | 83% 1014F^                                                                                                                                                                                                                                                        | Okyerofc                                                                                                                                                                                                                                                                                                                              | Ghana                                       | 16               | E-MTAB-1903                   |
| Tiassale11FC     | Tiassale                     | coluzzii   | Cote D'Ivoire                             | Tiassale                      | 5.90,-4.83                                                                                                                                               | 2011                                | Unexposed                                                                     |                                            | 23% (perm)                                                                                                                                                                                                               |                                       | 83% 1014F^                                                                                                                                                                                                                                                        | N'Gouso*                                                                                                                                                                                                                                                                                                                              | Cameroon                                    | 16               | E-MTAB-1903                   |
| KovieMaliFC      | Kovie                        | coluzzii   | Togo                                      | Kovie                         | 6.34,1.11                                                                                                                                                | 2011                                | Unexposed                                                                     |                                            | Unknown                                                                                                                                                                                                                  |                                       | Unknown                                                                                                                                                                                                                                                           | Malanville                                                                                                                                                                                                                                                                                                                            | Benin                                       | 16               | E-MTAB-1889                   |
| KovieOkyerofc    | Kovie                        | coluzzii   | Togo                                      | Kovie                         | 6.34,1.11                                                                                                                                                | 2011                                | Unexposed                                                                     |                                            | Unknown                                                                                                                                                                                                                  |                                       | Unknown                                                                                                                                                                                                                                                           | Okyerofc                                                                                                                                                                                                                                                                                                                              | Ghana                                       | 16               | E-MTAB-1889                   |
| YouandeFC        | Youande                      | gambiae    | Cameroon                                  | Youande                       | 3.85,11.5*                                                                                                                                               | 2010-2013                           | Bendiocarb                                                                    | 1 hour                                     | 53.2-100%                                                                                                                                                                                                                | Cultivated sites                      | Unknown                                                                                                                                                                                                                                                           | Kisumu*                                                                                                                                                                                                                                                                                                                               | Kenya                                       | 17               | E-MTAB-1563                   |
| DarFC            | Dar                          | arabiensis | Tanzania                                  | Dar Es Salaam                 | 39.78,-6.81                                                                                                                                              | 2011                                | Unexposed                                                                     |                                            | 100% (Delta)                                                                                                                                                                                                             | Urban                                 | Unknown                                                                                                                                                                                                                                                           | Ifakara*                                                                                                                                                                                                                                                                                                                              | Tanzania                                    | 18               | E-MEXP-3987                   |
| MuhezaFC         | Muheza                       | arabiensis | Tanzania                                  | Muheza                        | 39.07,-6.82                                                                                                                                              | 2011                                | Unexposed                                                                     |                                            | 100% (Delta)                                                                                                                                                                                                             | Non-Polluted                          | Unknown                                                                                                                                                                                                                                                           | Ifakara*                                                                                                                                                                                                                                                                                                                              | Tanzania                                    | 18               | E-MEXP-3987                   |
| HaiFC            | Hai                          | arabiensis | Tanzania                                  | Hai District                  | 37.23,-3.31                                                                                                                                              | 2011                                | Unexposed                                                                     |                                            | 84-87% (Delta)                                                                                                                                                                                                           | Agriculture                           | Unknown                                                                                                                                                                                                                                                           | Ifakara*                                                                                                                                                                                                                                                                                                                              | Tanzania                                    | 18               | E-MEXP-3987                   |
|                  |                              |            |                                           |                               | Latitude, Longitude. * represents exact collection site as reported by the relevant publication. Others are estimations based on town/city of collection |                                     |                                                                               |                                            | If unexposed mosquitoes used in microarray experiment, then the insecticide used for mortality calculations in the study are shown in parentheses, otherwise mortality data corresponds to insecticide used in exposure. |                                       | * kdr frequency in survivors. ^ kdr frequency in collected mosquitoes. " Unpublished. Percentages are given where recorded in the study. No percentage indicates presence of mutation but no frequency reported. Unknown indicate no data given on the population | * Indicates a fully susceptible population with pyrethroid mortality > 90%. Unguja was collected from Unguja Island at the same time as the Pemba samples, these exhibited suspected resistance (81.9%-88.4%) to permethrin. Okyerofc and Malanville are carbamate susceptible populations and are assumed susceptible to pyrethroids |                                             |                  |                               |



Supplementary Table 2: Transcripts showing consistent fold change directionality across all pyrethroid exposed arrays. VectorBase ID, Transcript name or description, average fold changes across all the arrays and fold changes of all relevant data sets are displayed. Transcripts consistently up-regulated trend are highlighted in red, and down-regulated in green.

| VectorBase ID | Transcript Type                                                                                  | Average Fold Change | BioInfoC | KluewC | BouskaC | MBRC   | TiassaleC | PembaMosC | PembaDarC | WadMedanC | JinjaMosC | JinjaDonC | VK2012C | VK2011C |
|---------------|--------------------------------------------------------------------------------------------------|---------------------|----------|--------|---------|--------|-----------|-----------|-----------|-----------|-----------|-----------|---------|---------|
| AGAP001659-RA | hexamerin [Source:VB Community Annotation]                                                       | 7.630               | 2.181    | 4.213  | 5.634   | 10.411 | 8.192     | 3.427     | 1.922     | 1.417     | 25.032    | 21.271    | 5.826   | 2.038   |
| AGAP008217-RA | CYP6Z3                                                                                           | 5.909               | 1.659    | 4.935  | 10.037  | 12.805 | 9.902     | 3.797     | 1.279     | 6.352     | 4.874     | 8.548     | 4.093   | 2.629   |
| AGAP008217-RA | CYP6Z3                                                                                           | 5.672               | 1.659    | 4.935  | 10.037  | 12.805 | 9.902     | 3.797     | 1.279     | 6.352     | 4.874     | 8.548     | 4.093   | 2.629   |
| AGAP013061-RA | Haemolymph juvenile hormone binding                                                              | 4.992               | 9.368    | 2.477  | 7.311   | 12.476 | 13.812    | 1.942     | 1.794     | 2.527     | 1.068     | 1.458     | 4.336   | 1.393   |
| AGAP008217-RA | CYP6Z3                                                                                           | 4.629               | 1.659    | 4.935  | 10.037  | 12.805 | 9.902     | 3.797     | 1.279     | 6.352     | 4.874     | 8.548     | 4.093   | 2.629   |
| AGAP001345-RA | hexamerin [Source:VB Community Annotation]                                                       | 4.503               | 1.473    | 3.785  | 3.611   | 8.285  | 5.644     | 3.050     | 1.348     | 1.184     | 10.075    | 10.393    | 3.557   | 1.635   |
| AGAP002603-RA | elongation factor 1 alpha-like protein [Source:VB Community Annotation]                          | 4.020               | 17.965   | 1.334  | 4.399   | 1.986  | 7.581     | 1.063     | 1.004     | 1.003     | 1.034     | 1.013     | 4.995   | 4.860   |
| AGAP007161-RA | alpha-crystallin chain A [Source:VB Community Annotation]                                        | 3.938               | 8.439    | 5.670  | 4.479   | 3.341  | 8.625     | 2.661     | 1.020     | 1.618     | 2.861     | 4.787     | 2.688   | 1.071   |
| AGAP008217-RA | CYP6Z3                                                                                           | 3.881               | 1.659    | 4.935  | 10.037  | 12.805 | 9.902     | 3.797     | 1.279     | 6.352     | 4.874     | 8.548     | 4.093   | 2.629   |
| AGAP008438-RA |                                                                                                  | 3.442               | 2.136    | 3.625  | 3.893   | 4.237  | 2.248     | 1.229     | 1.483     | 6.882     | 3.973     | 5.462     | 4.877   | 2.546   |
| AGAP001706-RA |                                                                                                  | 3.180               | 1.644    | 2.699  | 1.919   | 1.656  | 2.521     | 6.042     | 1.441     | 1.710     | 2.812     | 6.345     | 1.792   | 8.183   |
| AGAP008021-RA | CYP12F2                                                                                          | 3.152               | 1.276    | 10.790 | 1.912   | 1.774  | 1.753     | 1.340     | 1.137     | 2.234     | 3.724     | 8.768     | 1.458   | 1.405   |
| AGAP008021-RA | CYP12F2                                                                                          | 3.131               | 1.276    | 10.790 | 1.912   | 1.774  | 1.753     | 1.340     | 1.137     | 2.234     | 3.724     | 8.768     | 1.458   | 1.405   |
| AGAP009766-RA |                                                                                                  | 3.016               | 2.223    | 1.027  | 2.141   | 2.955  | 1.427     | 6.395     | 1.619     | 5.160     | 1.347     | 4.893     | 3.911   | 3.089   |
| AGAP008021-RA | CYP12F2                                                                                          | 2.901               | 1.276    | 10.790 | 1.912   | 1.774  | 1.753     | 1.340     | 1.137     | 2.234     | 3.724     | 8.768     | 1.458   | 1.405   |
| AGAP008021-RA | CYP12F2                                                                                          | 2.852               | 1.276    | 10.790 | 1.912   | 1.774  | 1.753     | 1.340     | 1.137     | 2.234     | 3.724     | 8.768     | 1.458   | 1.405   |
| AGAP004164-RC | GSTD1_6                                                                                          | 2.706               | 1.818    | 1.832  | 2.611   | 1.427  | 1.099     | 1.342     | 1.445     | 4.807     | 6.358     | 2.598     | 1.927   | 1.821   |
| AGAP006985-RA |                                                                                                  | 2.548               | 2.008    | 3.714  | 1.634   | 1.152  | 3.883     | 1.395     | 1.813     | 1.753     | 4.259     | 5.370     | 1.259   | 2.434   |
| AGAP004382-RA | GSTD3                                                                                            | 2.352               | 1.208    | 1.849  | 1.660   | 1.287  | 2.255     | 2.369     | 1.654     | 2.195     | 4.929     | 3.762     | 2.304   | 2.756   |
| AGAP004382-RA | GSTD3                                                                                            | 2.347               | 1.208    | 1.849  | 1.660   | 1.287  | 2.255     | 2.369     | 1.654     | 2.195     | 4.929     | 3.762     | 2.304   | 2.756   |
| AGAP001698-RA | deoxyribonuclease I [Source:VB Community Annotation]                                             | 2.317               | 2.008    | 1.849  | 1.660   | 1.287  | 2.255     | 2.369     | 1.654     | 2.195     | 4.929     | 3.762     | 2.304   | 2.756   |
| AGAP002940-RA | coiled-coil-helix-coiled-coil-helix domain containing 4 [Source:VB Community Annotation]         | 2.316               | 3.522    | 2.418  | 1.883   | 5.002  | 2.485     | 1.540     | 1.015     | 1.455     | 1.125     | 1.104     | 3.487   | 2.821   |
| AGAP004382-RA | GSTD3                                                                                            | 2.253               | 3.939    | 1.215  | 2.658   | 2.495  | 2.964     | 1.011     | 1.113     | 1.177     | 1.428     | 3.402     | 2.428   | 3.203   |
| AGAP004382-RA | GSTD3                                                                                            | 2.237               | 2.08     | 1.849  | 1.660   | 1.287  | 2.255     | 2.369     | 1.654     | 2.195     | 4.929     | 3.762     | 2.304   | 2.756   |
| AGAP004164-RC | GSTD1_6                                                                                          | 2.229               | 1.818    | 1.832  | 2.611   | 1.427  | 1.099     | 1.342     | 1.445     | 4.807     | 6.358     | 2.598     | 1.927   | 1.821   |
| AGAP009743-RA | ribonuclease Z [Source:VB Community Annotation]                                                  | 1.944               | 1.157    | 1.879  | 2.416   | 3.821  | 1.906     | 1.441     | 1.238     | 2.080     | 2.025     | 2.606     | 1.374   | 1.381   |
| AGAP009346-RA | GSTM5                                                                                            | 1.931               | 1.667    | 2.738  | 1.979   | 1.271  | 1.509     | 1.517     | 1.428     | 1.121     | 2.011     | 2.905     | 3.007   | 1.995   |
| AGAP010932-RA |                                                                                                  | 1.893               | 3.445    | 1.617  | 2.056   | 2.551  | 1.662     | 1.187     | 1.006     | 1.420     | 1.060     | 1.231     | 3.436   | 2.043   |
| AGAP004113-RA | 39S ribosomal protein L55, mitochondrial [Source:VB Community Annotation]                        | 1.693               | 3.493    | 1.274  | 1.857   | 2.405  | 1.637     | 1.216     | 1.427     | 1.100     | 1.335     | 1.255     | 2.151   | 1.267   |
| AGAP008761-RA | translocan-associated protein subunit gamma [Source:VB Community Annotation]                     | 1.671               | 2.666    | 1.184  | 1.453   | 1.188  | 1.968     | 1.966     | 1.289     | 1.190     | 2.036     | 1.774     | 1.712   | 1.622   |
| AGAP010772-RA | Synaptotagmin [Source:VB Community Annotation]                                                   | 1.659               | 1.870    | 3.128  | 1.524   | 1.645  | 1.268     | 1.052     | 1.330     | 1.262     | 1.007     | 2.060     | 1.717   | 2.038   |
| AGAP011318-RA |                                                                                                  | 1.629               | 3.201    | 1.371  | 1.203   | 1.518  | 1.094     | 1.863     | 1.228     | 1.801     | 1.281     | 1.180     | 2.961   | 1.373   |
| AGAP013098-RA |                                                                                                  | 1.623               | 2.052    | 1.056  | 1.277   | 1.430  | 1.370     | 3.569     | 1.269     | 1.020     | 1.695     | 1.270     | 1.744   | 1.724   |
| AGAP006364-RC | ABC-B (AGAP006364)                                                                               | 1.620               | 1.702    | 1.700  | 2.101   | 3.320  | 2.005     | 1.102     | 1.042     | 1.447     | 1.017     | 1.477     | 1.214   | 1.312   |
| AGAP005055-RA | ion-transport peptide CHH-like [Source:VB Community Annotation]                                  | 1.620               | 1.114    | 1.454  | 1.748   | 2.478  | 1.761     | 2.495     | 1.170     | 1.845     | 1.282     | 1.502     | 1.404   | 1.182   |
| AGAP004163-RA | GSTD7                                                                                            | 1.552               | 1.188    | 1.204  | 2.086   | 1.679  | 2.104     | 2.019     | 1.236     | 1.333     | 1.371     | 1.811     | 1.050   | 1.466   |
| AGAP004163-RA | GSTD7                                                                                            | 1.546               | 1.188    | 1.204  | 2.086   | 1.679  | 2.104     | 2.019     | 1.236     | 1.333     | 1.371     | 1.811     | 1.050   | 1.466   |
| AGAP004163-RA | GSTD7                                                                                            | 1.543               | 1.153    | 1.159  | 2.042   | 1.758  | 2.063     | 2.284     | 1.204     | 1.182     | 1.331     | 1.966     | 1.008   | 1.371   |
| AGAP006364-RC | ABC-B (AGAP006364)                                                                               | 1.541               | 1.608    | 1.593  | 2.400   | 3.118  | 2.549     | 1.080     | 1.072     | 1.493     | 1.012     | 1.552     | 1.264   | 1.280   |
| AGAP006651-RA | peroxisomal 3,2-trans-enoyl-CoA isomerase [Source:VB Community Annotation]                       | 1.530               | 2.474    | 1.329  | 1.283   | 1.201  | 1.163     | 1.034     | 1.213     | 1.304     | 1.219     | 1.066     | 2.718   | 2.358   |
| AGAP007121-RA | cytochrome b5 protein [Source:VB Community Annotation]                                           | 1.515               | 0.759    | 2.130  | 2.320   | 1.627  | 2.365     | 4.678     | 2.831     | 2.144     | 2.055     | 1.699     | 1.822   | 1.504   |
| AGAP012514-RA | iron-regulated short-chain dehydrogenase/reductase [Source:VB Community Annotation]              | 1.485               | 1.396    | 1.593  | 1.541   | 1.012  | 1.462     | 1.651     | 1.331     | 1.003     | 1.801     | 1.593     | 1.763   | 1.671   |
| AGAP009192-RA | GSTES                                                                                            | 1.482               | 1.184    | 1.614  | 0.830   | 1.499  | 1.496     | 0.828     | 1.374     | 1.812     | 1.652     | 2.812     | 2.304   | 2.266   |
| AGAP007366-RC | COXA5C                                                                                           | 1.475               | 2.429    | 1.050  | 1.742   | 1.488  | 1.392     | 1.015     | 1.274     | 1.063     | 1.244     | 1.374     | 2.199   | 1.452   |
| AGAP004598-RA | Phosphoserine aminotransferase [Source:UniProtKB/TrEMBL/ACC:Q5TRW7]                              | 1.471               | 1.428    | 1.436  | 1.738   | 2.122  | 2.061     | 1.042     | 1.582     | 1.197     | 1.384     | 1.191     | 1.034   | 1.434   |
| AGAP007366-RA |                                                                                                  | 1.465               | 2.478    | 1.000  | 1.706   | 1.434  | 1.448     | 1.103     | 1.211     | 1.048     | 1.149     | 1.235     | 2.275   | 1.487   |
| AGAP005768-RA | hexamerin [Source:VB Community Annotation]                                                       | 1.462               | 2.117    | 1.500  | 1.120   | 1.979  | 1.898     | 1.637     | 1.007     | 1.469     | 1.431     | 1.633     | 1.404   | 1.146   |
| AGAP001314-RA |                                                                                                  | 1.447               | 2.271    | 1.519  | 1.067   | 1.718  | 1.802     | 1.210     | 1.077     | 1.025     | 1.227     | 1.262     | 1.834   | 1.354   |
| AGAP004163-RA | GSTD7                                                                                            | 1.434               | 1.188    | 1.204  | 2.086   | 1.679  | 2.104     | 2.019     | 1.236     | 1.333     | 1.371     | 1.811     | 1.050   | 1.466   |
| AGAP010499-RA |                                                                                                  | 1.419               | 1.374    | 1.560  | 1.216   | 1.202  | 1.626     | 0.926     | 1.220     | 1.170     | 2.145     | 1.707     | 1.451   | 1.605   |
| AGAP007059-RA |                                                                                                  | 1.417               | 1.179    | 1.258  | 1.515   | 1.156  | 1.409     | 1.775     | 1.059     | 1.242     | 1.686     | 1.651     | 1.061   | 1.197   |
| AGAP010499-RA |                                                                                                  | 1.410               | 1.374    | 1.560  | 1.216   | 1.202  | 1.626     | 0.926     | 1.220     | 1.170     | 2.145     | 1.707     | 1.451   | 1.605   |
| AGAP003903-RA | Required for meiotic nuclear division 1 homolog (S. cerevisiae) [Source:VB Community Annotation] | 1.410               | 2.253    | 1.898  | 1.116   | 1.337  | 1.289     | 1.792     | 1.249     | 1.105     | 1.632     | 1.000     | 1.161   | 1.084   |
| AGAP006364-RC | ABC-B (AGAP006364)                                                                               | 1.401               | 1.614    | 1.707  | 2.360   | 3.943  | 1.962     | 1.078     | 1.088     | 1.475     | 0.986     | 1.604     | 1.284   | 1.390   |
| AGAP010499-RA |                                                                                                  | 1.371               | 1.374    | 1.560  | 1.216   | 1.202  | 1.626     | 0.926     | 1.220     | 1.170     | 2.145     | 1.707     | 1.451   | 1.605   |
| AGAP006617-RA | Armadillo repeat-containing protein 6 [Source:VB Community Annotation]                           | 1.355               | 1.482    | 1.475  | 1.604   | 1.321  | 1.483     | 1.325     | 1.079     | 1.059     | 1.175     | 1.527     | 1.099   | 1.630   |
| AGAP010414-RA | CYPC28                                                                                           | 1.335               | 1.265    | 1.250  | 1.160   | 1.223  | 1.147     | 0.962     | 1.317     | 1.507     | 1.302     | 1.782     | 1.624   | 1.083   |
| AGAP012143-RA | mTFRC domain-containing protein, mitochondrial [Source:VB Community Annotation]                  | 1.318               | 1.184    | 1.565  | 1.131   | 1.155  | 1.291     | 1.398     | 1.181     | 1.654     | 1.170     | 1.514     | 1.534   | 1.533   |
| AGAP013519-RA | U6 snRNA-associated 5m-like protein Lm53 [Source:VB Community Annotation]                        | 1.291               | 1.739    | 1.033  | 1.292   | 1.425  | 1.055     | 1.704     | 1.013     | 1.220     | 1.064     | 1.141     | 1.684   | 1.118   |
| AGAP006700-RA | COXA5C                                                                                           | 1.290               | 1.471    | 1.159  | 1.642   | 1.466  | 1.340     | 1.021     | 1.099     | 1.043     | 1.099     | 1.157     | 1.546   | 1.621   |
| AGAP010346-RA | merlin [Source:VB Community Annotation]                                                          | 1.287               | 1.216    | 1.170  | 1.340   | 1.696  | 1.354     | 1.655     | 1.149     | 1.029     | 1.021     | 1.004     | 1.785   | 1.023   |
| AGAP007564-RA |                                                                                                  | 1.280               | 1.404    | 1.227  | 1.135   | 1.634  | 1.014     | 1.376     | 1.185     | 1.028     | 1.190     | 1.535     | 1.085   | 1.547   |
| AGAP010447-RA | gamma-glutamylcyclotransferase [Source:VB Community Annotation]                                  | 1.272               | 1.204    | 1.127  | 1.117   | 1.371  | 1.116     | 1.552     | 1.534     | 1.199     | 1.310     | 1.143     | 1.095   | 1.494   |
| AGAP006884-RA |                                                                                                  | 1.252               | 1.130    | 1.133  | 1.401   | 1.580  | 1.180     | 1.460     | 1.061     | 1.190     | 1.135     | 1.430     | 1.219   | 1.108   |
| AGAP011816-RA |                                                                                                  | 1.247               | 1.864    | 1.260  | 1.169   | 1.258  | 1.104     | 1.088     | 1.281     | 1.012     | 1.106     | 1.525     | 1.264   | 1.027   |
| AGAP005300-RA | dehydrogenase/reductase SDR family member 11 precursor [Source:VB Community Annotation]          | 1.229               | 1.530    | 1.110  | 1.094   | 1.100  | 1.106     | 1.031     | 1.045     | 1.055     | 1.050     | 1.067     | 1.791   | 1.786   |
| AGAP007395-RA | DIS3-like exonuclease 2 [Source:UniProtKB/TrEMBL/ACC:Q7QJBS]                                     | 1.223               | 1.020    | 1.193  | 1.241   | 1.501  | 1.183     | 1.260     | 1.020     | 1.303     | 1.360     | 1.201     | 1.094   | 1.299   |
| AGAP006700-RA | COEA80                                                                                           | 1.186               | 1.471    | 1.319  | 1       |        |           |           |           |           |           |           |         |         |

Supplementary Table 3: Transcripts showing consistently significant fold change directionality across all pyrethroid resistant Anopheles coluzzii transcripts. VectorBase ID, Transcript name or description, the average fold changes across all the arrays and the fold changes for the relevant data sets are displayed. Transcripts consistently up-regulated trend are highlight in red, and down-regulated in green.

| VectorBase ID | Gene Name/Description                                                                    | Average Fold Change | BiokofC | BouakeFC | MBeFC  | TiassaleFC | VK6FC  | BanforaFC | TengrelaFC | VK72012FC | VK72011FC | TiassaleMalifC | Tiassale2011FC |
|---------------|------------------------------------------------------------------------------------------|---------------------|---------|----------|--------|------------|--------|-----------|------------|-----------|-----------|----------------|----------------|
| AGAP006879-RA | F-type H+-transporting ATPase subunit e [Source:VB Community Annotation]                 | 37.262              | 102.582 | 7.876    | 34.885 | 58.465     | 13.418 | 19.793    | 15.424     | 33.888    | 9.524     | 26.519         | 87.510         |
| AGAP013192-RA | venom allergen [Source:VB Community Annotation]                                          | 29.939              | 30.696  | 21.823   | 52.061 | 86.939     | 1.380  | 19.253    | 2.363      | 62.987    | 3.284     | 1.586          | 46.958         |
| AGAP002364-RB | MICOS complex subunit MIC60 [Source:UniProtKB/TrEMBL;Acc:FSHK71]                         | 12.681              | 18.552  | 10.760   | 27.297 | 25.023     | 3.206  | 3.991     | 1.704      | 19.588    | 1.395     | 1.809          | 26.169         |
| AGAP002364-RA | MICOS complex subunit MIC60 [Source:UniProtKB/TrEMBL;Acc:FSHK71]                         | 11.958              | 18.386  | 9.180    | 25.921 | 21.336     | 3.114  | 3.924     | 1.629      | 19.421    | 1.374     | 1.774          | 25.480         |
| AGAP007160-RB | alpha-crystallin chain B [Source:VB Community Annotation]                                | 11.467              | 7.841   | 15.426   | 14.444 | 13.709     | 17.990 | 34.759    | 5.672      | 4.103     | 2.878     | 3.796          | 5.519          |
| AGAP007160-RC | alpha-crystallin chain B [Source:VB Community Annotation]                                | 11.170              | 7.719   | 15.190   | 14.124 | 13.368     | 18.747 | 32.009    | 5.550      | 4.047     | 2.898     | 3.755          | 5.464          |
| AGAP007160-RA | alpha-crystallin chain B [Source:VB Community Annotation]                                | 10.095              | 7.869   | 14.592   | 13.541 | 11.943     | 14.287 | 26.791    | 5.890      | 4.110     | 2.912     | 3.812          | 5.303          |
| AGAP012982-RA | long wavelength sensitive opsin 3 [Source:VB Community Annotation]                       | 9.388               | 13.565  | 2.769    | 2.610  | 3.560      | 15.870 | 13.664    | 3.285      | 11.278    | 2.077     | 2.640          | 31.954         |
| AGAP009110-RA |                                                                                          | 8.085               | 5.811   | 5.266    | 8.426  | 5.393      | 4.127  | 2.433     | 21.802     | 3.330     | 21.656    | 7.971          | 2.721          |
| AGAP008684-RB | juvenile hormone epoxide hydrolase [Source:VB Community Annotation]                      | 5.635               | 3.940   | 4.022    | 3.649  | 4.468      | 3.094  | 13.781    | 4.654      | 8.069     | 5.753     | 3.002          | 7.554          |
| AGAP006383-RA | oligosaccharyltransferase complex subunit beta [Source:VB Community Annotation]          | 5.009               | 9.396   | 2.542    | 5.680  | 8.040      | 1.360  | 1.682     | 3.496      | 7.030     | 4.288     | 4.155          | 7.426          |
| AGAP012608-RA | Proteasome subunit beta type [Source:UniProtKB/TrEMBL;Acc:Q7QLL8]                        | 4.971               | 9.759   | 2.236    | 2.096  | 2.286      | 2.929  | 9.342     | 1.831      | 9.722     | 2.014     | 1.633          | 10.828         |
| AGAP007249-RB |                                                                                          | 4.760               | 7.461   | 2.588    | 2.845  | 1.897      | 2.492  | 10.802    | 1.768      | 9.017     | 1.500     | 2.035          | 9.958          |
| AGAP009828-RA |                                                                                          | 4.730               | 2.328   | 6.824    | 3.268  | 6.985      | 7.619  | 7.098     | 2.276      | 4.101     | 2.029     | 2.032          | 7.468          |
| AGAP008438-RA |                                                                                          | 4.580               | 2.136   | 3.803    | 4.237  | 2.248      | 3.054  | 20.397    | 2.691      | 4.877     | 2.546     | 1.495          | 2.891          |
| AGAP001136-RA | tetralricopeptide repeat protein 35 [Source:VB Community Annotation]                     | 4.498               | 2.329   | 2.968    | 8.428  | 5.736      | 1.601  | 4.176     | 4.497      | 6.309     | 5.442     | 3.020          | 4.975          |
| AGAP000513-RA | dipeptidase E [Source:VB Community Annotation]                                           | 4.085               | 16.017  | 3.224    | 2.738  | 1.700      | 1.527  | 2.977     | 2.191      | 7.782     | 2.538     | 1.899          | 2.347          |
| AGAP001998-RA | 28S ribosomal protein S10, mitochondrial [Source:VB Community Annotation]                | 4.033               | 9.593   | 2.709    | 2.595  | 2.181      | 1.783  | 5.304     | 2.105      | 9.582     | 1.734     | 1.360          | 5.420          |
| AGAP007780-RA | NADH dehydrogenase (ubiquinone) 1 beta subcomplex 10 [Source:VB Community Annotation]    | 3.638               | 4.439   | 5.378    | 3.410  | 2.545      | 1.385  | 6.942     | 3.907      | 2.989     | 1.509     | 2.918          | 4.599          |
| AGAP01052-RA  | aldose reductase [Source:VB Community Annotation]                                        | 3.473               | 3.520   | 2.464    | 4.328  | 5.404      | 1.258  | 4.371     | 3.330      | 5.772     | 3.192     | 2.044          | 2.526          |
| AGAP007249-RA |                                                                                          | 3.257               | 1.837   | 2.059    | 3.908  | 4.037      | 1.445  | 2.505     | 3.217      | 6.356     | 3.145     | 2.948          | 4.369          |
| AGAP002940-RA | coiled-coil-helix-coiled-coil-helix domain containing 4 [Source:VB Community Annotation] | 2.893               | 3.939   | 2.658    | 2.495  | 2.964      | 1.183  | 3.314     | 3.713      | 2.428     | 3.203     | 2.710          | 3.220          |
| AGAP007249-RA |                                                                                          | 2.873               | 1.837   | 2.059    | 3.908  | 4.037      | 1.445  | 2.505     | 3.217      | 6.356     | 3.145     | 2.948          | 4.369          |
| AGAP002419-RA | CYP4D22                                                                                  | 2.760               | 3.102   | 3.009    | 3.449  | 4.124      | 1.659  | 2.034     | 2.112      | 2.047     | 2.262     | 2.197          | 3.959          |
| AGAP007403-RA |                                                                                          | 2.306               | 1.690   | 2.058    | 2.497  | 2.078      | 4.604  | 1.872     | 1.997      | 1.700     | 2.053     | 2.165          | 2.651          |
| AGAP007589-RA | UGT306A2                                                                                 | 2.272               | 1.821   | 1.305    | 1.808  | 3.458      | 1.557  | 1.688     | 2.677      | 2.754     | 3.090     | 1.955          | 2.879          |
| AGAP006651-RA | peroxisomal 3,2-trans-enoyl-CoA isomerase [Source:VB Community Annotation]               | 2.160               | 2.474   | 1.283    | 1.201  | 1.163      | 2.959  | 2.210     | 2.856      | 2.718     | 2.358     | 2.161          | 2.373          |
| AGAP012953-RA | epidermal retinal dehydrogenase [Source:VB Community Annotation]                         | 2.084               | 2.232   | 2.453    | 1.742  | 3.519      | 1.655  | 2.478     | 2.144      | 1.746     | 1.711     | 1.596          | 1.646          |
| AGAP013502-RA |                                                                                          | 1.806               | 2.105   | 1.590    | 1.732  | 1.651      | 1.928  | 2.260     | 1.166      | 2.206     | 1.275     | 1.241          | 2.709          |
| AGAP007115-RA |                                                                                          | 0.642               | 0.863   | 0.700    | 0.739  | 0.527      | 0.675  | 0.339     | 0.666      | 0.619     | 0.838     | 0.542          | 0.552          |
| AGAP007120-RA | nucleoside-diphosphate kinase [Source:VB Community Annotation]                           | 0.610               | 0.800   | 0.362    | 0.487  | 0.395      | 0.495  | 0.639     | 0.815      | 0.698     | 0.719     | 0.796          | 0.505          |
| AGAP012788-RA | cytosolic Fe-S cluster assembly factor NUBP2 homolog [Source:VB Community Annotation]    | 0.609               | 0.788   | 0.547    | 0.527  | 0.564      | 0.507  | 0.496     | 0.698      | 0.490     | 0.759     | 0.809          | 0.509          |
| AGAP002101-RA | isoleucyl-tRNA synthetase [Source:VB Community Annotation]                               | 0.568               | 0.469   | 0.635    | 0.805  | 0.520      | 0.650  | 0.591     | 0.512      | 0.586     | 0.514     | 0.528          | 0.443          |
| AGAP003485-RA | thioredoxin domain-containing protein [Source:VB Community Annotation]                   | 0.481               | 0.711   | 0.292    | 0.326  | 0.408      | 0.550  | 0.371     | 0.440      | 0.539     | 0.558     | 0.656          | 0.442          |
| AGAP002969-RA | asparaginyl-tRNA synthetase [Source:VB Community Annotation]                             | 0.475               | 0.662   | 0.448    | 0.657  | 0.384      | 0.536  | 0.493     | 0.422      | 0.400     | 0.457     | 0.423          | 0.342          |
| AGAP004684-RA | rRNA-processing protein CGR1 [Source:VB Community Annotation]                            | 0.307               | 0.140   | 0.121    | 0.119  | 0.277      | 0.609  | 0.580     | 0.439      | 0.215     | 0.274     | 0.356          | 0.244          |
| AGAP004880-RC | L-lactate dehydrogenase [Source:UniProtKB/TrEMBL;Acc:Q7Q981]                             | 0.259               | 0.198   | 0.250    | 0.403  | 0.174      | 0.497  | 0.161     | 0.112      | 0.296     | 0.284     | 0.213          | 0.265          |
| AGAP004880-RA | L-lactate dehydrogenase [Source:UniProtKB/TrEMBL;Acc:Q7Q981]                             | 0.251               | 0.202   | 0.249    | 0.382  | 0.180      | 0.413  | 0.179     | 0.112      | 0.305     | 0.278     | 0.214          | 0.252          |
| AGAP004880-RB | L-lactate dehydrogenase [Source:UniProtKB/TrEMBL;Acc:Q7Q981]                             | 0.246               | 0.194   | 0.243    | 0.394  | 0.181      | 0.362  | 0.175     | 0.109      | 0.294     | 0.277     | 0.214          | 0.263          |
| AGAP006414-RA | chitinase [Source:VB Community Annotation]                                               | 0.212               | 0.391   | 0.254    | 0.280  | 0.456      | 0.063  | 0.016     | 0.027      | 0.012     | 0.012     | 0.488          | 0.334          |



**Supplementary Table 5: VectorBase ID, Gene Description, Log fold change and adjusted p value for transcripts significantly differentially expressed in the Maf-S knockdown arrays compared to GFP-injected controls. Only transcripts overlapping with transcript list in Supplementary Tables 2 and 3 in this manuscript are shown. The full data set is available in Ingham et al, 2017.**

**Maf-S regulated genes overlapping with Table S2**

| VectorBase ID | Gene Description                    | logFC  | adj.P.Val |
|---------------|-------------------------------------|--------|-----------|
| AGAP001161-RA | Long Wavelength Sensitive Opsin     | 2.523  | 0.002     |
| AGAP002603-RA | Elongation Factor-like              | 0.743  | 0.002     |
| AGAP013519-RA | U6 snRNA-associated sm-like Protein | -0.562 | 0.003     |
| AGAP004113-RA | 39S Ribosomal Protein L55           | -0.535 | 0.005     |
| AGAP010499-RA | S-glutathione Dehydrogenase         | -0.545 | 0.005     |
| AGAP002110-RA | Cell Division Control Protein 7     | 0.705  | 0.006     |
| AGAP001314-RA |                                     | -0.412 | 0.007     |
| AGAP001659-RA | Hexamerin                           | 0.358  | 0.008     |
| AGAP006599-RA | ATP-dependent RNA Helicase A        | 0.460  | 0.011     |
| AGAP010346-RA | Merlin                              | -0.556 | 0.015     |
| AGAP009192-RA | GSTE5                               | -0.409 | 0.018     |
| AGAP005187-RA |                                     | 0.322  | 0.020     |
| AGAP007161-RA | a-crystallin Chain A                | 0.688  | 0.020     |
| AGAP013008-RA |                                     | -0.604 | 0.031     |
| AGAP000512-RA | Transcriptional Enhancer Factor     | 0.241  | 0.037     |
| AGAP004958-RA | Ethanolaminephosphotransferase      | -0.454 | 0.038     |
| AGAP007366-RB |                                     | 0.362  | 0.045     |
| AGAP008217-RA | CYP6Z3                              | -0.217 | 0.049     |

**Maf-S regulated genes overlapping with Table S3**

|               |                                 |        |       |
|---------------|---------------------------------|--------|-------|
| AGAP004880-RC | L-Lactate Dehydrogenase         | 1.620  | 0.001 |
| AGAP004880-RB | L-Lactate Dehydrogenase         | 1.670  | 0.001 |
| AGAP004880-RA | L-Lactate Dehydrogenase         | 1.690  | 0.001 |
| AGAP012982-RA | Long Wavelength Sensitive Opsin | 1.040  | 0.001 |
| AGAP004684-RA | rRNA-processing protein CGR1    | -0.865 | 0.002 |
| AGAP012953-RA | Epidermal retinal dehydrogenase | -0.617 | 0.002 |
| AGAP007403-RA |                                 | 0.833  | 0.005 |
| AGAP007120-RA |                                 | -0.733 | 0.005 |
| AGAP007249-RA |                                 | 0.575  | 0.007 |
| AGAP002969-RA | Asparaginyl-tRNA synthetase     | 0.485  | 0.010 |
| AGAP009110-RA |                                 | -1.520 | 0.011 |
| AGAP007160-RC | alpha-crystallin chain B        | 1.380  | 0.014 |
| AGAP002101-RA | isoleucyl-tRNA synthetase       | 0.495  | 0.016 |
| AGAP007160-RB |                                 | 1.350  | 0.016 |
| AGAP007249-RB |                                 | 0.365  | 0.018 |
| AGAP007160-RA | alpha-crystallin chain B        | 1.240  | 0.021 |

|               |                                                      |        |       |
|---------------|------------------------------------------------------|--------|-------|
| AGAP012788-RA | Cytosolic Fe-S cluster assembly factor NUBP2 homolog | -0.348 | 0.023 |
| AGAP013192-RA | Venom Allergen                                       | -0.493 | 0.046 |

**Supplementary Table 6: Detoxification  
Transcripts showing significantly reduced  
fold change in dsMet knockdown arrays  
compared to GFP-injected controls.  
VectorBase ID, Transcript name in addition  
to the fold changes across all the arrays are  
displayed.**

| VectorBase ID | Gene Name | Fold Change |
|---------------|-----------|-------------|
| AGAP011507-RA | COE13O    | 0.443       |
| AGAP006724-RA | COEAE3G   | 0.714       |
| AGAP005372-RA | COEBE3C   | 0.678       |
| AGAP005658-RA | CYP15B1   | 0.776       |
| AGAP005992-RA | CYP302A1  | 0.58        |
| AGAP008682-RA | CYP307B1  | 0.769       |
| AGAP002429-RA | CYP314A1  | 0.796       |
| AGAP009246-RA | CYP4C27   | 0.579       |
| AGAP009241-RA | CYP4C36   | 0.706       |
| AGAP002418-RA | CYP4D16   | 0.731       |
| AGAP000877-RA | CYP4G17   | 0.646       |
| AGAP001864-RA | CYP4H15   | 0.609       |
| AGAP002416-RA | CYP4K2    | 0.546       |
| AGAP008212-RA | CYP6M2    | 0.375       |
| AGAP008213-RA | CYP6M3    | 0.332       |
| AGAP008208-RA | CYP6Y1    | 0.559       |
| AGAP008207-RA | CYP6Y2    | 0.584       |
| AGAP012294-RA | CYP9L2    | 0.642       |
| AGAP004172-RA | GSTD9     | 0.717       |
| AGAP009195-RA | GSTE1     | 0.761       |
| AGAP009197-RA | GSTE3     | 0.608       |
| AGAP009191-RA | GSTE6     | 0.794       |
| AGAP000165-RA | GSTMS1    | 0.779       |
| AGAP008404-RA | UGT301C1  | 0.645       |
| AGAP007028-RA | UGT302J1  | 0.652       |
| AGAP005750-RA | UGT308B2  | 0.546       |
| AGAP007374-RA | UGT49A3   | 0.526       |

**Supplementary Table 7: Enrichment in Tiassale abdomen carcass of transcripts represented in the CYP4G16 correlation network. ID, Log2 Fold change, adjusted p value and absolute fold change of all transcripts present in the CYP4G16 correlation network at cut-of p=0.85. Highlighted in blue are significant (p<=0.05) adjusted p values, red show enriched transcripts and green down-regulated transcripts in the abdomen carcass of Tiassale. See Ingham et al. 2014**

| SystematicName | logFC        | adj.P.Val | FC       |
|----------------|--------------|-----------|----------|
| AGAP013094-RA  | 3.176254258  | 0.000147  | 9.039571 |
| AGAP001899-RA  | 3.171054945  | 8.17E-05  | 9.007052 |
| AGAP000877-RA  | 2.73208152   | 8.70E-05  | 6.644136 |
| AGAP003197-RA  | 2.72357561   | 5.83E-05  | 6.605078 |
| AGAP001473-RA  | 2.705907289  | 0.000156  | 6.524681 |
| AGAP010059-RA  | 2.688152585  | 9.38E-05  | 6.444876 |
| AGAP009609-RA  | 2.562919543  | 0.000192  | 5.909023 |
| AGAP001076-RA  | 2.560553916  | 3.73E-05  | 5.899341 |
| AGAP001076-RB  | 2.513719311  | 5.29E-05  | 5.710905 |
| AGAP001076-RC  | 2.505468505  | 5.83E-05  | 5.678337 |
| AGAP012405-RA  | 2.186076912  | 0.000114  | 4.550664 |
| AGAP005984-RA  | 2.126856101  | 0.000155  | 4.367647 |
| AGAP003239-RA  | 2.105140554  | 0.000489  | 4.302397 |
| AGAP003733-RA  | 2.09288528   | 9.38E-05  | 4.266004 |
| AGAP005984-RB  | 2.089960943  | 0.000211  | 4.257365 |
| AGAP001076-RD  | 2.069975002  | 9.64E-05  | 4.198794 |
| AGAP003050-RA  | 2.020409464  | 0.00041   | 4.056989 |
| AGAP007692-RA  | 1.96967687   | 9.32E-05  | 3.916804 |
| AGAP004318-RA  | 1.850045116  | 0.000143  | 3.605115 |
| AGAP008012-RA  | 1.803679004  | 0.000186  | 3.491094 |
| AGAP009874-RA  | 1.580966153  | 0.003443  | 2.991701 |
| AGAP002925-RC  | 1.563619162  | 5.84E-05  | 2.955944 |
| AGAP003571-RC  | 1.560666445  | 0.001812  | 2.949901 |
| AGAP002925-RA  | 1.550844523  | 5.83E-05  | 2.929886 |
| AGAP010193-RA  | 1.541293971  | 0.000653  | 2.910554 |
| AGAP002925-RB  | 1.540051014  | 5.84E-05  | 2.908048 |
| AGAP001181-RA  | 1.505647405  | 0.000369  | 2.839521 |
| AGAP004719-RA  | 1.48767276   | 8.38E-05  | 2.804362 |
| AGAP009879-RA  | 1.353087829  | 0.000997  | 2.554583 |
| AGAP007939-RA  | 1.312314519  | 0.001418  | 2.483396 |
| AGAP006410-RA  | 1.081436531  | 0.00023   | 2.116142 |
| AGAP006410-RB  | 1.058175994  | 0.000266  | 2.082297 |
| AGAP003168-RA  | 1.007105755  | 0.000882  | 2.009875 |
| AGAP010325-RA  | 0.925666085  | 0.000576  | 1.899561 |
| AGAP013507-RA  | 0.599688705  | 0.003968  | 1.51539  |
| AGAP007119-RA  | 0.2545319    | 0.340874  | 1.192949 |
| AGAP001903-RA  | -0.1776637   | 0.436704  | 0.884134 |
| AGAP004992-RA  | -0.497289689 | 0.004022  | 0.708436 |
| AGAP010226-RA  | -0.534951529 | 0.015484  | 0.690182 |
| AGAP004722-RA  | -0.595734568 | 0.027057  | 0.661707 |
| AGAP007827-RA  | -0.62765219  | 0.133673  | 0.647229 |
| AGAP002500-RA  | -0.694479005 | 0.007311  | 0.617932 |
| AGAP004778-RA  | -0.876842047 | 0.001298  | 0.544558 |
| AGAP010517-RA  | -0.896942993 | 0.002295  | 0.537023 |

**Supplementary Table 8: qPCR primer sets and dsRNA primer sets. (a) qPCR Primers: AGAP identifier, gene description, forward and reverse primers, product size and the number of splice variants the primer covers. (b) RNAi primers: AGAP identifier, gene description, forward and reverse primers and product size**

| ID         | Info                     | Forward Primer            | Reverse Primer         | Size | Splice variants |
|------------|--------------------------|---------------------------|------------------------|------|-----------------|
| AGAP008438 | Unknown                  | TTAAGCCACCAGAGGGCAAC      | TCCAACCTCGTCCCCAACTC   | 103  | 1               |
| AGAP006879 | ATPase                   | GTTCTGGTCGTCGGAGTTG       | TGGCGTCACGGATAACCTTC   | 110  | 1               |
| AGAP013061 | JH-related               | AGGATCATCTGTCCCTCGC       | TGATTTACCCAGCACACGG    | 105  | 1               |
| AGAP002603 | EF-like protein          | AAAACCATCCCAGCAAACGTG     | TCGTAATCATCGTAGACAGCGT | 137  | 1               |
|            |                          |                           |                        |      |                 |
| AGAP007160 | alpha-crystallin chain B | AGCGTTCAACTTTTTCTCC       | AAGCGTTGTTGATCGAATCTCT | 155  | 4               |
| AGAP007161 | alpha-crystallin chain A | GAACGAACCGTCCCATAACA      | TCTGTCCGCTCATTTGCCAT   | 105  | 1               |
| AGAP007162 | alpha-crystallin chain A | ACACTTTACACGCCGCTACA      | GACTTTTTCGGTGCGGTCAC   | 105  | 2               |
| AGAP007159 | alpha-crystallin chain B | GCACTGTGAGTTCATCAGTTGAATA | TGCCGCTTGAGAAATGTCCT   | 105  | 1               |
| AGAP007158 | alpha-crystallin chain B | AGACACTTTGTGCGACGCTA      | TGATGGGGATGCTTCGTTCC   | 145  | 1               |
|            |                          |                           |                        |      |                 |
| AGAP001659 | Hexamerin                | TACAGTGCGTTCATCCCGAG      | CAGGCCAATGTCCTCCATGA   | 93   | 1               |
| AGAP001345 | Hexamerin                | GGGTGAAGTGTCTCCGTGT       | TCGTTGACGTAGTAGCGAGC   | 132  | 1               |
| AGAP001657 | Hexamerin                | TACAAGTGGGTGATGGACGC      | TGAAGTACAGCTGGAACGGC   | 136  | 1               |
| AGAP005766 | Hexamerin                | AACCACAAGCCGTTCACTA       | AACTTGGGTCCGACGAACG    | 87   | 1               |
| AGAP005767 | Hexamerin                | AGACCTACGCTGTGTTCCAC      | GAACTTGGGTCCGACAAACG   | 128  | 1               |
| AGAP005768 | Hexamerin                | ATACGCCGACAAGGATTTGCTG    | TGGAATCATCCGACACCCAG   | 124  | 1               |
|            |                          |                           |                        |      |                 |
| AGAP000646 | Dm                       | CCGTCCGATTCGATGAAGAAATC   | ACGAGGCGGTGCGTATCTT    | 127  | 1               |
| AGAP006022 | Met                      | TGCGGGTGGACTATGTGTTT      | ACGTCACCGTGAGCAGAAAT   | 108  | 1               |



# User Guide

## IR-TEEx: Insecticide Resistance Transcript Explorer

V.A Ingham, D. Peng, S. Wagstaff and H. Ranson

**LSTM**  
LIVERPOOL SCHOOL  
OF TROPICAL MEDICINE

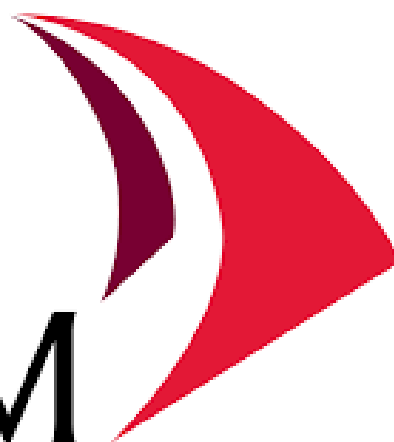

## Contents

|                                                                   |   |
|-------------------------------------------------------------------|---|
| Section 1: Introduction .....                                     | 1 |
| IR-TE <sub>x</sub> basics .....                                   | 1 |
| Performance and Resources .....                                   | 2 |
| Installing IR-TE <sub>x</sub> .....                               | 2 |
| Section 2: Inputting other resistance datasets .....              | 3 |
| Overview of Entering Data .....                                   | 3 |
| Adding data to the web-based app .....                            | 3 |
| Adding data to a local IR-TE <sub>x</sub> installation .....      | 3 |
| Section 3: Adapting the App to Handle Other Expression Data ..... | 5 |
| Creating a new data file .....                                    | 5 |
| Populating the data file .....                                    | 5 |
| Modifying the R code to accept your data .....                    | 6 |
| Use of one colour arrays and RNASeq data with the app .....       | 6 |
| Section 4: References .....                                       | 9 |
| Where to find help .....                                          | 9 |
| Version .....                                                     | 9 |

## Section 1: Introduction

IR-TEX is an app written in ShinyR to explore microarray datasets that compare resistant and susceptible *Anopheles gambiae*, *An. coluzzi* and *An. arabiensis* populations, available in public repositories, in a user friendly manner. In its current form, IR-TEX allows the user to search for transcripts of interest using a VectorBase Transcript ID by: Country; Exposure Status; Species and Insecticide Class. The user can also find co-correlated transcripts across experiments by manipulating the Absolute Correlation Value (recommended: 0.7-0.9). The outputs from IR-TEX come in several forms.

### IR-TEX basics

IR-TEX can be used to explore the relationships between expression levels of transcripts across populations of Anopheline vectors with varying levels of resistance to insecticides. To run the IR-TEX simply visit the GitHub page which will contain a link to the current application web page. IR-TEX is currently hosted at: <https://www.lstmed.ac.uk/projects/ir-tex>  
The output **below** shows the appearance of a typical *Interactive Dashboard* displaying transcript expression, experiment and geographical location.

**IR-TEX**      Edit Transcript, must end in -RA/-RB etc.

Transcript ID  
AGAP006212 RA

Select Relevant Countries

- Burkina Faso
- Cameroun
- Equatorial Guinea
- Kenya
- Senegal
- Uganda
- Togo

Select Exposure Status

- Exposed
- Unexposed

Select Relevant Species

- Anopheles gambiae*
- Anopheles coluzzi*
- Anopheles arabiensis*

Select Insecticide Class

- Pyrethroid
- Organochlorine
- DDT
- None

Absolute Correlation Value. NB Do NOT select low values for low sample size

0.88

1.

2. 

| Systematic Name | Classification Class | Transcript Type | KluweFC     | VK72012FC   | VK72011FC   | BouakeFC    | MBuFC       | TessouFC    | BikouFC     | PerebeMouFC | PerebeMoujaFC |
|-----------------|----------------------|-----------------|-------------|-------------|-------------|-------------|-------------|-------------|-------------|-------------|---------------|
| AGAP006212 RA   | CYP6M2               | Cytochrome p450 | 3.207614217 | 4.275432915 | 2.873592858 | 4.021253106 | 1.613906396 | 10.25751934 | 0.248555783 | 0.703164893 | 1.521903870   |
| AGAP006212 RA   | CYP6M2               | Cytochrome p450 | 3.412891023 | 1.349391457 | 2.848233735 | 3.964804411 | 1.626601073 | 10.70355331 | 0.231824754 | 0.802388838 | 1.548119183   |
| AGAP006212 RA   | CYP6M2               | Cytochrome p450 | 3.439196099 | 1.239393185 | 2.893225021 | 3.982209524 | 1.609993888 | 10.03999931 | 0.244636555 | 0.740916885 | 1.35138361    |
| AGAP006212 RA   | CYP6M2               | Cytochrome p450 | 3.610013806 | 1.731133002 | 2.873592858 | 3.856118157 | 1.081007036 | 10.0337935  | 0.208837908 | 0.708291507 | 1.426788695   |

3. Significant: 20    Total: 31

4.

5.

6.

7. 

| Correlation | Systematic Name | Classification Class | Transcript Type | KluweFC     | VK72012FC   | VK72011FC   | BouakeFC    | MBuFC       | TessouFC    | BikouFC     | PerebeMouFC |
|-------------|-----------------|----------------------|-----------------|-------------|-------------|-------------|-------------|-------------|-------------|-------------|-------------|
| 1           | AGAP006212 RA   | CYP6M2               | Cytochrome p450 | 3.207614217 | 4.275432915 | 2.873592858 | 4.021253106 | 1.613906396 | 10.25751934 | 0.248555783 | 1.521903870 |

8.

The interactive dashboard is composed of the following:

- 1) **Expression Line Graph** showing the  $\log_2$  fold change of the transcript of interest for each microarray data set
- 2) **Probe Expression Table** showing the VectorBase Transcript ID, Detoxification Class, Transcript Description, raw Fold Change (FC) and Q value (Q) (adjusted p-value) for each **probe** (row) and dataset (column).
- 3) **Summary Data** showing the number of arrays in which the transcript is significantly differential.
- 4) **Download** to obtain a local copy of the Probe Expression Table.
- 5) **Map** highlighting the location of the data set containing the transcript of interest with significant differential expression illustrated as a traffic light system.
- 6) **Correlation Line Graph** showing the  $\log_2$  fold change of the transcript of interest and transcripts correlated with the transcript of interest (if any) with an absolute correlation greater than that user defined threshold.
- 7) **Correlated Transcript Expression Table** showing the VectorBase Transcript ID, Detoxification Class, Transcript Description, raw Fold Change (FC) and Q value (Q) (adjusted p-value) for each **transcript of interest or correlated transcript** (row) and dataset (column).
- 8) **Download** to obtain a local copy of the Correlated Transcript Expression Table

### Performance and Resources

IR-TE<sub>x</sub> requires only a relatively modest amount of computing power per user. The most computationally intensive part of the application is the initial generation of the correlation matrix. The default matrix that loads on application startup includes an optimum number of datasets and correlation threshold which typically takes ~4s to load on standard Intel i7 processor, consuming ~3GB of RAM in the process. IR-TE<sub>x</sub> is best ran locally if regular use is intended.

NB. Recalculation of the matrix is required **each time** a dataset is added or subtracted or an option changed. An increased amount of processing power is required if, for example, **all** studies are included or a **low** correlation threshold is selected.

### Installing IR-TE<sub>x</sub>

IR-TE<sub>x</sub> is a ShinyR application and can be downloaded and installed for free from the following GitHub site at [https://github.com/LSTMScientificComputing/IR-TE<sub>x</sub>](https://github.com/LSTMScientificComputing/IR-TE<sub>x</sub) and includes a number of files, including a table of fold change and Q values, and a longitude-latitude file for geographical locations of the collection sites. To install locally, the app needs to be installed alongside the packages **dismo** (<https://cran.r-project.org/web/packages/dismo/index.html>), **rgdal** (<https://cran.r-project.org/web/packages/rgdal/index.html>), **shinycssloaders** (<https://cran.r-project.org/web/packages/shinycssloaders/index.html>) and **ShinyR**. Instructions for the latter are available here - <https://shiny.rstudio.com>.

## Section 2: Inputting other resistance datasets

### Overview of Entering Data

All datasets used in this app are currently from the LSTM Agilent 15K array V1 (A-MEXP-2196), dating from AgamP3.5 (2009). Although this array is the most commonly used for insecticide resistance experiments due to the multiple probes for ‘detoxification family’ genes, we recognise that other array designs may be used in the future. There are two options for inputting these datasets; the first is to use fold changes and Q values for probes only found on the original arrays and the second is to set missing probes to ‘0’ which would cause them to be missing within the app. Below is a walkthrough to adding more resistance datasets to the existing data, without having to change any core code within the app.

### Adding data to the web-based app

To add new datasets to the existing web-based app, please email the first author with the new experimental files and designs, in addition to latitude and longitude of collection site of the resistant population: [victoria.ingham@lstmed.ac.uk](mailto:victoria.ingham@lstmed.ac.uk).

### Adding data to a local IR-TE<sub>x</sub> installation

The following is a step-by-step guide to adding data to a **local installation** of IR-TE<sub>x</sub>. Please follow the steps below

1. **Get the data files** - within the github repository, there are a number of files, including the user guide. Please download the following files and save them to an appropriate folder: Fold Changes.txt, geography.txt, IR-TE<sub>x</sub>.R.
2. **Open the file** Fold Changes.txt – this is a large excel file with RAW fold changes (NOT logged).
3. **Examine the file** - The first row contains the name of the population, followed by FC (necessary) and also by Q (necessary). Find the final column with FC and insert a row to the right, as illustrated below:

|    | AG        | AH                   | AI | AJ                | AK       | AL       | AM    |
|----|-----------|----------------------|----|-------------------|----------|----------|-------|
|    | Muheza    | DarFC                |    | andomQ            | GarreQ   | MessaQ   | Biokc |
|    | Tanzania  | Tanzania             |    | iron              | Cameroc  | Cameroc  | Equa  |
|    | Exposed   | Unexposed            |    | Exposed           | Exposed  | Exposed  | Expo: |
|    | Anopheles | Anopheles arabiensis |    | Anopheles gambiae | Anopheli | Anopheli | Anop  |
|    | None      | None                 |    | Organochloride    | Organoc  | Organoc  | Pyret |
| 16 | 1.0945    | 1.215914457          |    | 0.01046184        | 0.007    | 0.0018   | 0.15  |
| 19 | 0.6108    | 0.5786339664         |    | 0.09996918        | 0.0005   | 0.0002   | 0.01  |
| 2  | 0.8559    | 0.958956217          |    | 0.009640153       | 0.0213   | 0.2075   | 0.3   |
| 13 | 0.7942    | 0.799666491          |    | 0.593556          | 0.0933   | 0.129    | 0.74  |
| 13 | 1.3706    | 1.954915503          |    | 0.000109636       | 0.0428   | 0.4765   | 0.7   |
| 13 | 1.3448    | 2.080200064          |    | 5.45E-05          | 0.0275   | 0.3679   | 0.72  |
| 17 | 1.3968    | 1.981184102          |    | 9.75E-05          | 0.0473   | 0.5445   | 0.75  |
| 9  | 0.8713    | 0.869041035          |    | 0.0356042         | 0.0008   | #####    | 0.00  |
| 2  | 1.0839    | 0.810208087          |    | 0.00046706        | 0.1647   | 0.3473   | 0.01  |
| 17 | 1.0273    | 0.778329292          |    | 0.05053176        | 0.0026   | 0.0019   | 0.04  |
| 5  | 0.9984    | 1.004418288          |    | 0.9583704         | 0.6608   | 0.7144   | 0.80  |
| 5  | 0.9642    | 1.007757879          |    | 0.9601651         | 0.9715   | 0.7049   | 0.18  |
| 11 | 1.0966    | 1.372242917          |    | 0.002968533       | 0.0022   | 0.0005   | 0.43  |
| 16 | 1.4232    | 2.600579211          |    | 0.3353777         | 0.0238   | #####    | 0.01  |
| 15 | 2.7363    | 3.005440446          |    | 0.000107827       | 0.005    | 0.0055   | 0.5   |
| 22 | 1.7044    | 1.30345457           |    | 0.005023932       | 0.035    | 0.0002   | 0.00  |
| 21 | 0.9747    | 1.016993365          |    | 0.2032325         | 0.9619   | 0.709    | 0.40  |
| 12 | 1.0203    | 0.999083548          |    | 0.1980279         | 0.5769   | 0.5012   | 0.4   |
| 18 | 1.6647    | 1.607715034          |    | 0.04581127        | 0.0134   | 0.0408   | 0.04  |
| 11 | 1.0573    | 1.076187249          |    | 0.01281673        | 0.0261   | 0.0709   | 0.02  |
| 11 | 1.7831    | 2.64615335           |    | 0.001077468       | 0.0247   | 0.2883   | 0.02  |
| 11 | 1.0001    | 1.065598949          |    | 0.3898523         | 0.8872   | 0.517    | 0.94  |
| 7  | 1.0074    | 0.967714224          |    | 0.000724491       | 0.0011   | #####    | 0.00  |
| 12 | 1.499     | 1.332019443          |    | 0.000328694       | 0.0004   | 0.0001   | 0.00  |
| 11 | 0.9882    | 0.956473743          |    | 0.0350447         | 0.0079   | 0.2318   | 0.0   |
| 14 | 1.1108    | 1.285074919          |    | 0.0018664797      | 0.1236   | 0.018    | 0.65  |
| 11 | 0.8301    | 0.723330267          |    | 0.1845474         | 0.0738   | 0.1021   | 0.1   |
| 19 | 1.1348    | 1.560160635          |    | 0.00023843        | 0.0065   | 0.1164   | 0.00  |
| 17 | 1.0144    | 1.069752248          |    | 0.07161631        | 0.2012   | 0.003    | ####  |
| 13 | 1.0053    | 1.041075432          |    | 0.2682464         | 0.0569   | 0.0414   | 0.01  |
| 11 | 0.7722    | 1.125083787          |    | 3.94E-05          | 0.0124   | 0.0031   | 0.0   |
| 7  | 1.1125    | 1.527598979          |    | 0.004200588       | 0.8946   | 0.0009   | 0.98  |
| 15 | 1.0372    | 1.077795636          |    | 0.1264069         | 0.894    | 0.7846   | 0.    |
| 12 | 1.0396    | 0.988491975          |    | 0.7484926         | 0.0474   | 0.1452   | 0.9   |
| 19 | 0.8463    | 0.632816218          |    | 0.1655635         | 0.2333   | 0.0013   | 0.04  |
| 18 | 1.0006    | 0.974291745          |    | 0.02931733        | 0.1832   | 0.9856   | 0.08  |
| 19 | 1.0024    | 1.041352769          |    | 0.2318954         | 0.4966   | 0.757    | 0.    |
| 14 | 0.9591    | 0.987008953          |    | 0.4482822         | 0.0351   | 0.0001   | 0.00  |
| 12 | 1.0544    | 1.052328498          |    | 0.8354674         | 0.219    | 0.0022   | 0.04  |
| 12 | 0.7801    | 0.957762831          |    | 0.006157403       | 0.1769   | 0.7361   | 0.11  |
| 12 | 0.886     | 0.902119226          |    | 0.007771193       | 0.0043   | 0.0264   | 0.31  |
| 11 | 1.0465    | 1.066495947          |    | 0.7621901         | 0.5149   | 0.3043   | 0.5   |
| 18 | 1.0259    | 0.981078975          |    | 0.7820762         | 0.5412   | 0.3422   | 0.8   |
| 15 | 0.9735    | 1.004631261          |    | 0.9307217         | 0.6966   | 0.5588   | 0.78  |
| 19 | 1.0032    | 0.997781213          |    | 0.9396286         | 0.9193   | 0.8101   | 0.94  |
| 13 | 0.9568    | 0.807073696          |    | 0.004465434       | 0.4465   | 0.0272   | 0.63  |
| 11 | 0.8033    | 0.797062081          |    | 0.03896334        | 0.0009   | 0.1311   | 0.25  |
| 15 | 1.0295    | 0.995219467          |    | 0.000172662       | 0.5363   | 0.6507   | 0.74  |
| 13 | 1.0045    | 0.988242847          |    | 0.879897          | 0.264    | 0.3335   | 0.21  |
| 17 | 1.0833    | 1.188352646          |    | 0.657131          | 0.0166   | 0.0023   | 0.00  |

4. **Insert dataset descriptors** - In the top cell insert a name for the population followed by FC, in the second the country of the resistant population, in the third either Exposed or Unexposed dependent upon whether the resistant population is exposed, in the fourth the species Anopheles gambiae, Anopheles coluzzi or Anopheles arabiensis (MUST be full species ID) and in the fifth cell down the class of insecticide or 'None' if unexposed. Underneath this paste the raw fold changes corresponding to the probe of this row. Repeat this with Q values in the furthest right column on the sheet, keeping all information in the top 5 columns identical whilst replacing FC with Q.
5. **Mapping data** - Now open geography.txt, it will contain a column of resistant population names, exactly how they appear in the Q value columns of Fold Changes.txt, a latitude and a longitude. Input your population name EXACTLY as it appears in the Q value column under the last row of the first column, followed by the latitude and longitude of the collection site (or approximate original location) of the new resistant population in the dataset.
6. **Install** – replace the existing files with your newly modified files (Fold Changes.txt, geography.txt) and restart the application.

### Section 3: Adapting the App to Handle Other Expression Data

Part of the utility of this app is use in a wider field than insecticide resistance alone. It will specifically be useful in fields that have a variety of transcriptomic data from different experiments, from which there will be some merit to analyse them together. To achieve this, there will need to be changes to the key code. For the purposes of this walkthrough, no previous knowledge of R is necessary but to fully adapt the code, R knowledge will be required. Due to this, the walkthrough will cover inputting data with ONLY 4 filtering criteria.

#### Creating a new data file

The first task is to create a new Fold Changes.txt file (tab delimited) to appropriately match the template provided for insecticide resistance as seen below.

| PROBE LIST | Population0FC | Population1FC | Population0Q | Population1Q |
|------------|---------------|---------------|--------------|--------------|
| FILTER 1   |               |               |              |              |
| FILTER 2   |               |               |              |              |
| FILTER 3   |               |               |              |              |
| FILTER 4   |               |               |              |              |
| Probe 1    |               |               |              |              |
| Probe 2    |               |               |              |              |
| Probe 3    |               |               |              |              |
| etc        |               |               |              |              |

#### Populating the data file

Enter the appropriate parameters for each filter, as in the example below. Capitalisation and punctuation is important in R so make sure everything is consistent and DO NOT change, for example, between ‘female’ and ‘Female’. These filters should overlap otherwise you will not be able to select multiple datasets

| PROBE LIST | Patient0FC | Patient1FC       | Patient0Q | Patient1Q        |
|------------|------------|------------------|-----------|------------------|
| FILTER 1   | Female     | Male             | Female    | Male             |
| FILTER 2   | Caucasian  | African American | Caucasian | African American |
| FILTER 3   | Infected   | Uninfected       | Infected  | Uninfected       |
| FILTER 4   | Treated    | Treated          | Treated   | Treated          |
| Probe 1    | 0.5        | 0.7              | 0.002     | 0.043            |
| Probe 2    | 1.23       | 2.45             | 0.062     | 0.1254           |
| Probe 3    | 10.2       | 1.24             | 0.00004   | 0.245            |
| etc        | 5.4        | 2.6              | 0.006     | 0.032            |

## Modifying the R code to accept your data

Once the data is in with the probes matching across rows for all datasets, the R code can now be modified by following the steps below.

The guide will assume that geography is NOT relevant to these datasets, so the map will be removed, as well as geography.txt. If geography is relevant ignore step a.) and the final step deleting lines 479-584 and modify the geographical parameters as in section (ii).

- a. Open the R code in a text editor, **delete** the line `library(dismo)` and the line `geography<-read.delim('geography.txt',header=T)`
- b. `titlePanel('IR-TEX', windowTitle = 'IR-TEX')` **Change** the name within the ‘ to your own dataset ie `titlePanel('Patient Data', windowTitle = 'Patient Data')`
- c. `textInput('textInput','Transcript ID',value='AGAP008212-RA')` **Change** the AGAP008212-RA to a probe on your array, ie in the above example `textInput('textInput','Transcript ID',value='Probe 1')`. It must be exact.
- d. `checkboxGroupInput('CountryInput','Select Relevant Countries',c('Burkina Faso','Cote D'Ivoire','Cameroon','Equatorial Guinea','Zambia','Tanzania','Sudan','Uganda','Togo'),selected=c('Burkina Faso','Cote D'Ivoire','Cameroon','Equatorial Guinea','Zambia','Tanzania','Sudan','Uganda','Togo'))` **Change** this line to your appropriate filters and those you wish to be selected when the app opens. For the example above this would become `checkboxGroupInput('CountryInput','Select Relevant Sex',c('Male','Female'),selected=c('Male','Female'))` This must correspond to the first row of filters, don't change 'CountryInput'
- e. `checkboxGroupInput('ExposureInput','Select Exposure Status',c('Exposed','Unexposed'),selected=c('Exposed','Unexposed'))` **Change** this to correspond to filter 2 `checkboxGroupInput('ExposureInput','Select Ethnicity Status',c('Caucasian','African American'),selected=c('Caucasian','African American'))` This must correspond to the second row of filters, don't change 'ExposureInput'
- f. `checkboxGroupInput('SpeciesInput','Select Relevant Species',c('Anopheles gambiae','Anopheles coluzzi','Anopheles arabiensis'),selected = c('Anopheles coluzzi'))` **Change** this to correspond to filter 3 `checkboxGroupInput('SpeciesInput','Select Infectious Status',c('Infected','Uninfected'),selected = c('Infected','Uninfected'))` This must correspond to the third row of filters, don't change 'SpeciesInput'
- g. `checkboxGroupInput('InsecticideInput','Select Insecticide Class',c('Pyrethroid','Organochloride','Carbamate','None'),selected = c('Pyrethroid','None'))` **Change** this to correspond to filter 4 `checkboxGroupInput('InsecticideInput','Select Treatment Regime',c('Treated','Untreated'),selected = c('Treated','Untreated'))` This must correspond to the fourth row of filters, don't change 'InsecticideInput'

There can be as many filters as required, each must be surrounded by 'X' and separated by a comma. The above correspond to lines 1-47 of the code. We will now scroll to lines 479-584. These will be **deleted** and begin/end to:

```
START: output$Geography <- renderPlot({
END   paste("Significant Transcripts Only (p", as.expression("<="),"0.05): FC > 5 = Red, FC > 1 = Amber, FC < 1 = Green",sep="")
})
```

Inclusive of the brackets: `}}`

## Use of one colour arrays and RNASeq data with the app

One-colour arrays have often been used due to the original high price of two-colour arrays. Similarly, different arrays and different analysis techniques are often used on array data. With the advent of RNAseq data, this leads to a further confounding variable when using this app. Each of these techniques have different distributions of fold change, below are examples of the fold change distributions of four different experiments from (a) two colour arrays, (b) one colour arrays and (c) RNAseq. In each case fold change is on the x axis and the y axis represents the number of transcripts for each fold change.



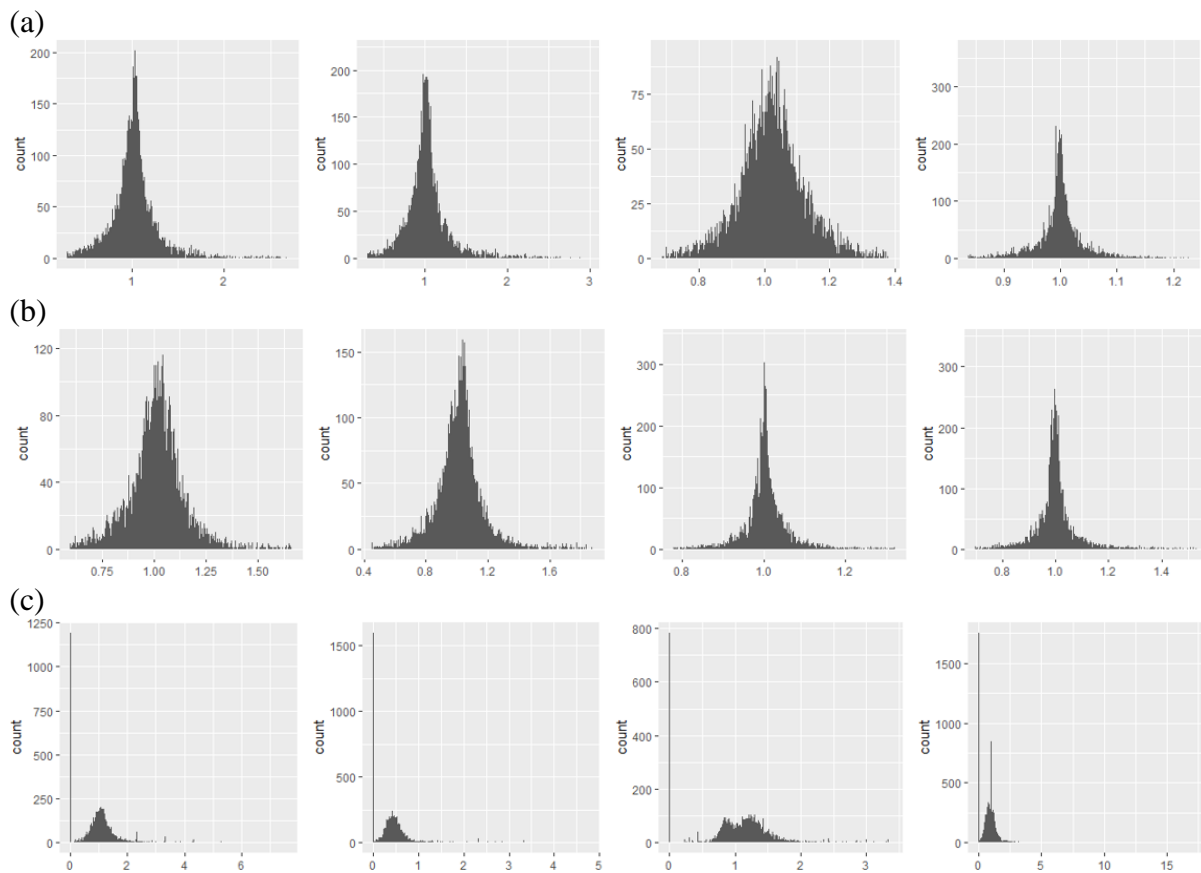

These differences in distributions are a confounding factor when integrating this data, specifically with use of correlation networks which are driven by extreme values, as often seen in RNAseq. To input data, follow guide in section ii, once this is complete and the data stored in a tab delimited text file, normalisation can be performed. By using a quantile normalisation across a table containing all fold changes, it is possible to make the distributions identical in terms of statistical properties and is a technique widely employed with microarray data analysis. As seen below, these distributions are much more similar after normalisation; this transformation can also be used across array platforms (Affymetrix, Agilent, Illumina etc.)

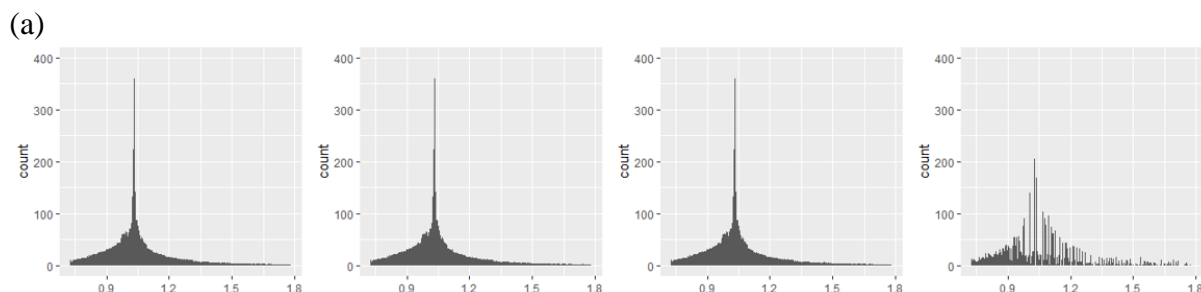

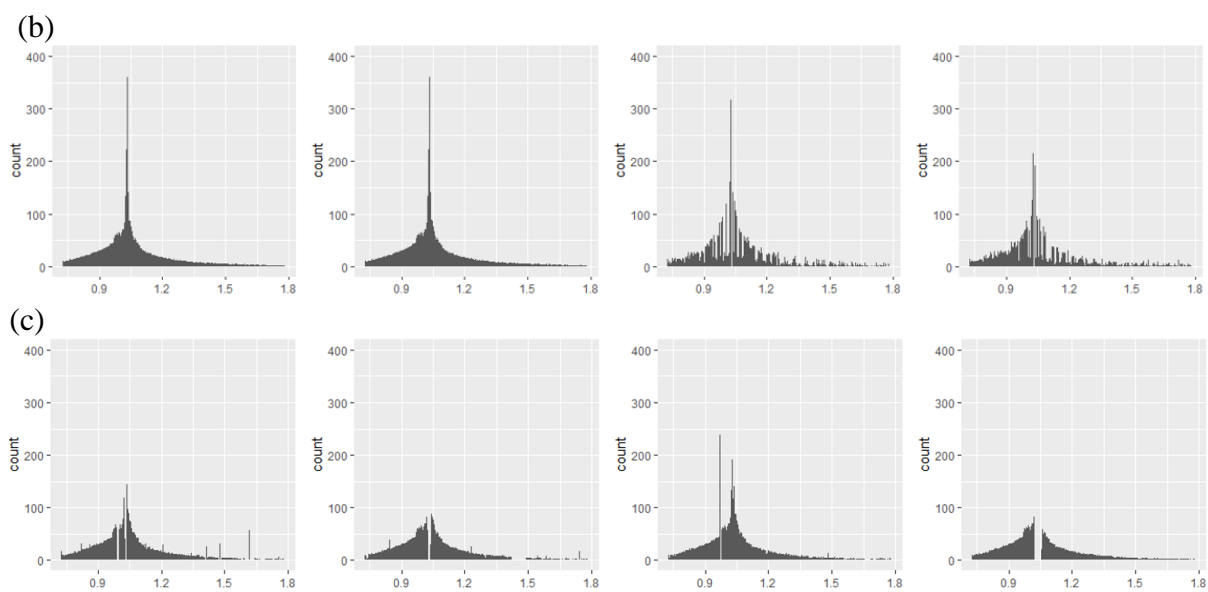

These data are kindly contributed by Duo Peng of the Catteruccia lab, Harvard T.H Chan School of Public Health.

## Section 4: References

For further information about algorithms and a description of the methods and use case please see our publication "**Transcriptomic meta-signatures identified in *Anopheles gambiae* populations reveal previously undetected insecticide resistance mechanisms**" V.A Ingham, S. Wagstaff and H. Ranson. Nature Comms.

### Where to find help

To install IR-TE<sub>x</sub>, you will need to download the current file from [https://github.com/LSTMScientificComputing/IR-TE<sub>x</sub>](https://github.com/LSTMScientificComputing/IR-TE<sub>x</sub) and execute it in a ShinyR environment.

Detailed instructions how to deploy the ShinyR environment can be found on the Shiny project webpage - <https://shiny.rstudio.com>. Example instructions on how to configure ShinyR for Ubuntu can be found here.

Example tutorial on installing for Ubuntu 16.04

<https://www.digitalocean.com/community/tutorials/how-to-set-up-shiny-server-on-ubuntu-16-04>

Example tutorial on installing for Ubuntu 14.04

<https://www.digitalocean.com/community/tutorials/how-to-set-up-shiny-server-on-ubuntu-14-04>

### Version

SW, VAI, HR authored the user guide

Data for different -omics platforms provided by DP

**Created on:** 20<sup>th</sup> August 2018

**Updated on:** 19<sup>th</sup> October 2018

**Version:** 1.1
